# Supplementary material for: Seasonal variation in mortality secondary to acute myocardial infarction in England and Wales: a secondary data analysis
Source: PubMed Central journal article supplement — BMJ Open. 2018 Jul 19;8(7):e019242. doi: 10.1136/bmjopen-2017-019242 (PMC6059346; doi:10.1136/bmjopen-2017-019242), 2018-07-19
Supplement: bmjopen-2017-019242.draft_revisions.pdf [file bmjopen-2017-019242.draft_revisions.pdf]

# BMJ Open

BMJ Open is committed to open peer review. As part of this commitment we make the peer review history of every article we publish publicly available.

When an article is published we post the peer reviewers' comments and the authors' responses online. We also post the versions of the paper that were used during peer review. These are the versions that the peer review comments apply to.

The versions of the paper that follow are the versions that were submitted during the peer review process. They are not the versions of record or the final published versions. They should not be cited or distributed as the published version of this manuscript.

BMJ Open is an open access journal and the full, final, typeset and author-corrected version of record of the manuscript is available on our site with no access controls, subscription charges or pay-per-view fees (<http://bmjopen.bmj.com>).

If you have any questions on BMJ Open's open peer review process please email [info.bmjopen@bmj.com](mailto:info.bmjopen@bmj.com)

# BMJ Open

## Seasonal variation in mortality secondary to acute myocardial infarction: a secondary data analysis

|                                 |                                                                                                                                                                                                                                                       |
|---------------------------------|-------------------------------------------------------------------------------------------------------------------------------------------------------------------------------------------------------------------------------------------------------|
| Journal:                        | <i>BMJ Open</i>                                                                                                                                                                                                                                       |
| Manuscript ID                   | bmjopen-2017-019242                                                                                                                                                                                                                                   |
| Article Type:                   | Research                                                                                                                                                                                                                                              |
| Date Submitted by the Author:   | 01-Sep-2017                                                                                                                                                                                                                                           |
| Complete List of Authors:       | Ogbebor, Osakpolor; Saint Peters University Hospital, Internal Medicine Odugbemi , Babatunde<br>Maheswaran, Ravi; University of Sheffield, School of Health and Related Research<br>Patel, Kavya; Saint Peters University Hospital, Internal Medicine |
| <b>Primary Subject Heading</b>: | Global health                                                                                                                                                                                                                                         |
| Secondary Subject Heading:      | Global health                                                                                                                                                                                                                                         |
| Keywords:                       | Winter mortality, Seasonal Variation, Myocardial infarction < CARDIOLOGY, Fuel poverty, Outdoor Temperature                                                                                                                                           |
|                                 |                                                                                                                                                                                                                                                       |

SCHOLARONE™  
Manuscripts

## Title

# Seasonal variation in mortality secondary to acute myocardial infarction: a secondary data analysis

Ogbebor Osakpolor, Saint Peter's University Hospital, USA. (Corresponding Author)  
(osakpolorogbebor@yahoo.com)

Odugbemi Babatunde, Lagos State University Teaching Hospital, Lagos, Nigeria.  
([batunde.odugbemi@yahoo.com](mailto:batunde.odugbemi@yahoo.com))

Maheswaran Ravi, University of Sheffield, Sheffield., UK. ([r.maheswaran@sheffield.ac.uk](mailto:r.maheswaran@sheffield.ac.uk))

Patel Kavya, Saint Peter's University Hospital, USA. ( [kavya\\_patel2007@yahoo.co.in](mailto:kavya_patel2007@yahoo.co.in))

## Abstract

**Background:** Acute myocardial infarction (AMI) is a leading cause of death globally. Increase in AMI mortality during winter has also been identified in existing literature. This has been associated with low outdoor and indoor temperatures and increasing age. The relationship between AMI and other factors such as gender and socioeconomic factors varies from study to study. Influenza epidemics have also been identified as a contributory factor.

**Objective:** This paper aims to illustrate the seasonal trend in mortality due to AMI in England and Wales with emphasis on excess winter mortality.

**Methods:** Monthly mortality rates per 10,000 population were calculated from data provided by the U.K. Office for National Statistics (ONS) for 1997 to 2005. To quantify the seasonal variation in winter, the excess winter mortality estimates (Excess Winter Mortality (EWM), Excess Winter Mortality Ratio (EWMR), Excess Winter Mortality Index (EWMI) for each year were calculated. Negative binomial regression model was used to estimate the relationship between increasing age and excess winter mortality.

**Results:** The decline in mortality rate for acute myocardial infarction was 6.8% yearly between August 1997 and July 2005. This decline was not seen with excess winter mortality. 17% excess deaths were observed during winter. This amounted to about 20,000 deaths over the 8 year period. Increasing winter mortality was seen with increasing age for AMI.

1  
2  
3 **Conclusion:** Seasonal variation in mortality secondary to AMI does occur in England and  
4 Wales. Excess winter deaths due to AMI have remained high despite decline in overall  
5 mortality. More research is needed to identify the relationship of sex, temperature,  
6 acclimatization and excess winter deaths due to AMI.  
7  
8  
9

### 10 11 **Strengths**

- 12 • The data used involved a large sample size and this was able to capture relevant results  
13 in the data analysis and this data represents the population of interest.
- 14 • The paper gives further insight into the concept of excess winter mortality.  
15  
16  
17  
18

### 19 **Limitations**

- 20 • Although the data provided by the ONS was complete and considered accurate, the data  
21 characteristics however restricted the number of variables that could be controlled such  
22 as sex distribution.
- 23 • The population data which was used as denominator would reduce in accuracy as the  
24 year of study moved away from the recent census (29<sup>th</sup> April 2001). This is because the  
25 midyear populations after this date were extrapolated using birth and death data; these  
26 data are prone to their own type of error. However, it is anticipated that the brief period  
27 used in the research was unlikely to experience any dramatic changes in population.  
28  
29  
30  
31  
32  
33  
34  
35

### 36 **Background**

37  
38 Studies over time have observed an increase in mortality rate during winter months<sup>1-3</sup>. This  
39 appears to be a global phenomenon with evidence of excess winter mortality occurring in a  
40 number of European countries, including the United Kingdom<sup>4,5</sup>, Japan<sup>6</sup>, Brazil<sup>7</sup>, Canada<sup>2</sup>,  
41 the United States<sup>3</sup> New Zealand<sup>8</sup> and likely any country where a winter season occurs.  
42  
43  
44  
45

46  
47 The relationship between mortality and temperature observes a U shape<sup>9</sup>: an increase in  
48 mortality is seen with extremes in temperature. Excess winter mortality which is defined as  
49 “a significant increase in the number of deaths during winter compared with the average of  
50 the non-winter seasons” has been linked to the drop in temperature<sup>10</sup>. Low temperatures have  
51 been implicated in the increase in number of deaths during the winter months however, they  
52 are not due to hypothermia. There is evidence to suggest that low temperatures trigger  
53 pathological mechanisms that lead to increase in blood pressure and thrombus formation<sup>2</sup>.  
54  
55  
56  
57  
58  
59  
60

1  
2  
3 The consequence of this is the initiation of physiological stress that results in the  
4 development of a myocardial infarction or a stroke.  
5  
6

7  
8 A study involving data from various countries in Europe found a similar association but also  
9 identified 18°C as the threshold for this to occur<sup>11</sup>. Research carried out in Scotland<sup>12</sup> and in  
10 England<sup>14</sup> could quantify this relationship: a 1°C drop in temperature resulted in a 1-2%  
11 increase in the number of deaths. This corresponds to increased odds of dying during the  
12 winter by 1.5%<sup>10</sup>.  
13  
14  
15  
16

17  
18 The effects of temperature are both direct and immediate. Time series analyses have shown  
19 that there is a minimum lag time of about 24 hours between drop in temperature and increase  
20 in mortality<sup>12</sup>. The impact of cold temperature could also extend over a period of 1 to 2  
21 weeks. This lag time shows that there is a possible mechanism that is initiated by the low  
22 outdoor temperatures directly that leads to death supporting evidence from previous studies.  
23 It has also been shown that the effect of temperature is significantly potentiated by high  
24 relative humidity and strong winds<sup>13</sup>.  
25  
26  
27  
28  
29

30  
31 There are suggestions that the influence of winters and low temperatures on the “spiked”  
32 increase in mortality rates is preventable. This is because there is ecological evidence that  
33 countries with colder winters do not have greater excess winter mortality when compared to  
34 countries with milder winters<sup>4</sup>, for example the United Kingdom when compared to  
35 Scandinavian countries<sup>14,15</sup>. This observation is referred to as the excess winter paradox.  
36 Factors that are considered to play a role include socioeconomic status<sup>15</sup>, influenza<sup>16,17</sup> and  
37 age<sup>14</sup>. Other factors considered include housing insulation and the concept of fuel poverty  
38 both of which affect the indoor temperature. Housing in Britain has lower insulation  
39 properties compared to houses in Germany, Russia or the Scandinavian countries<sup>18</sup>. Due to  
40 the low insulation properties of housing in England and Wales, it is more expensive to warm  
41 these homes when compared to houses in other European states. This introduces the concept  
42 of fuel poverty. Fuel poverty is defined as a situation “*when in order to heat its home to an*  
43 *adequate standard of warmth a household needs to spend more than 10% of its income on*  
44 *total fuel use*<sup>19</sup>.” The World Health Organization’s (WHO) recommendation of adequate  
45 standard warmth is defined as 18°C in occupied rooms and 21°C in living room. The  
46 temperature level of 18°C is remarkable because below this threshold has been identified as  
47 when significant mortality occurs. The ability to generate heat to a surrounding temperature  
48  
49  
50  
51  
52  
53  
54  
55  
56  
57  
58  
59  
60

1  
2  
3 above this identified threshold might prove necessary. The UK Government has  
4 acknowledged that excess winter mortality is a problem and currently has put in place some  
5 policies to tackle this phenomenon<sup>19</sup>  
6  
7  
8

9  
10 There are few studies that have taken examined the phenomenon of excess winter mortality  
11 specifically due to AMI in England and Wales. Most studies treat the subject of excess winter  
12 mortality by assessing total mortality without isolating individual diagnosis. Assessing  
13 individual diseases might produce stronger evidence on the impact seasonal variation on a  
14 particular disease condition. Due to the overwhelming global impact of this condition, it is  
15 important to identify seasonal variation of mortality due to AMI and also points of possible  
16 preventive strategies that can help in reducing the incidence of the disease.  
17  
18  
19  
20  
21

## 22 **Methodology**

23  
24 This study was a secondary data analysis that assessed excess winter deaths due to AMI in  
25 England and Wales. The study used anonymised mortality data provided by the office of  
26 National Statistics (ONS), United Kingdom (UK) and mean monthly temperature data  
27 provided by the Meteorological Office, UK. The database provided by the ONS consisted of  
28 anonymised data of daily mortality in England and Wales for the period from 1997 to 2005.  
29 The International Classification of Disease (ICD) was used for coding the various cause of  
30 death. The ninth edition (ICD-9) was used from 1997 to 2000 while the tenth edition (ICD-  
31 10) was used between 2001 and 2005. The cause of death considered for the study was acute  
32 myocardial Infarction (ICD-9: 410; ICD-10: I21). This was presented in 3 age groups: 0 to  
33 64 years, 65 to 74 years, and 75 years and above.  
34  
35  
36  
37  
38  
39  
40  
41  
42

43 Age-specific mortality rates were also calculated for each age group. The daily, monthly, and  
44 yearly mortality rates were calculated and the age specific population served as denominator.  
45 The population data for each year and each age group was extracted from ONS yearly  
46 publications. The monthly rates were standardised to 30 day months.  
47  
48  
49  
50

51 Adjustments in mortality rates were also made to account for changes in ICD coding. This  
52 was done using this formula:  $MA(y, d) = MO(y, d) \cdot R$ . MA is the adjusted daily mortality  
53 (deaths) for a day, d, in year, y. MO is the observed mortality. R is the comparability ratio:  
54  
55  
56  
57  
58  
59  
60

1  
2  
3 the ICD-10/ICD-9 comparability ratio for acute myocardial infarction 0.9889 was used to  
4 adjust ICD-9 code death counts<sup>20</sup>.  
5  
6

7  
8 Specifically the concept of excess winter deaths was explored in this study. The method used  
9 to analyse the excess winter deaths was first described by Curwen and it is similar to that  
10 used by the ONS<sup>23</sup>. The months of December to March defines the winter period. The non-  
11 winter period is defined as the months of August to November before this winter period, and  
12 the months of April to July following the winter period.  
13  
14  
15

16  
17  
18 In order to quantify the seasonal variation in winter, the excess winter mortality (EWM),  
19 excess winter mortality ratio (EWMR), and the excess winter mortality index (EWMI) for  
20 each year was calculated. The EWM reflects the absolute difference in mortality between the  
21 winter season and non-winter season. Whereas the EWMR represents the relative risk of  
22 death during the winter months compared to the non-winter months. The EWMI represents a  
23 variant of relative risk reduction or “excess”. The EWMR and EWMI are viable tools for  
24 comparisons between age, sex, regions or countries. These estimates were also calculated for  
25 each age group. These estimates were calculated using the following formulae:  
26  
27  
28  
29  
30

- 31 •  $EWM = O - E$
- 32 •  $EWMR = O/E$
- 33 •  $EWMI = (O - E)/E$  or  $EWMR - 1$  (represented as a percentage)  
34  
35  
36  
37

38 Where, O is the observed death count. This is the total death counts during the winter months,  
39 a period of 4 months, (winter deaths). E is the expected death count which is the total death  
40 counts during the non-winter months, a period of 8 months, divided by 2.  
41  
42  
43  
44

45 A regression model was used in assessing the rates of death during the winter season and  
46 non-winter seasons. The log-linear model was derived with the mortality count during winter  
47 period as the estimated outcome while age was the explanatory variable. The hypothesis was  
48 to test if there was any difference between excess winter mortality ratios amongst the various  
49 age groups. Therefore, the log of the average non-winter deaths was used as offset to fit the  
50 model. The model was fitted using a negative binomial model with a log link function due to  
51 over dispersion in the initial analysis.  
52  
53  
54  
55  
56  
57  
58  
59  
60

## Results

**Table: 1** Yearly mortality patterns of AMI from August 1997 to July 2005.

| Year Period* | Mortality Rate per 10,000 (Number of deaths) |                |                    |               |
|--------------|----------------------------------------------|----------------|--------------------|---------------|
|              | Age:                                         |                |                    |               |
|              | 0 to 64 years                                | 65 to 74 years | 75 years and above | Total         |
| <b>97/98</b> | 1.96 (8184)                                  | 24.72 (14299)  | 83.59 (33678)      | 10.87 (56161) |
| <b>98/99</b> | 1.81 (7581)                                  | 22.59 (13119)  | 79.84 (32283)      | 10.22 (52983) |
| <b>99/00</b> | 1.64 (6924)                                  | 20.11 (11724)  | 74.70 (30330)      | 9.41 (48978)  |
| <b>00/01</b> | 1.52 (6435)                                  | 17.99 (10528)  | 67.98 (27716)      | 8.55 (44679)  |
| <b>01/02</b> | 1.40 (5964)                                  | 16.28 (9567)   | 65.00 (26610)      | 8.03 (42141)  |
| <b>02/03</b> | 1.35 (5784)                                  | 14.71 (8685)   | 64.45 (26495)      | 7.77 (40964)  |
| <b>03/04</b> | 1.21 (5189)                                  | 13.39 (7937)   | 60.84 (25125)      | 7.22 (38251)  |
| <b>04/05</b> | 1.16 (5005)                                  | 11.84 (7066)   | 55.79 (23180)      | 6.62 (35251)  |
| <b>Total</b> | 1.51 (51066)                                 | 17.70 (82925)  | 69.02 (225417)     | 8.59 (359408) |

Between August 1997 and July 2005 there were 359,408 deaths due to acute myocardial infarction (AMI) with an average death count of 44,926 occurring yearly (Table 1). 62.7% of the total deaths were seen in the age group 75 years and above, 23.1% in age group 65 to 74 years and 14.2% in age group 0 to 64 years.

A steady decline in the absolute death counts as well as mortality rates were seen in all age groups across the years (Figure 1). Overall, the decline in mortality rate for acute myocardial infarction was 6.8% yearly between August 1997 and July 2005.



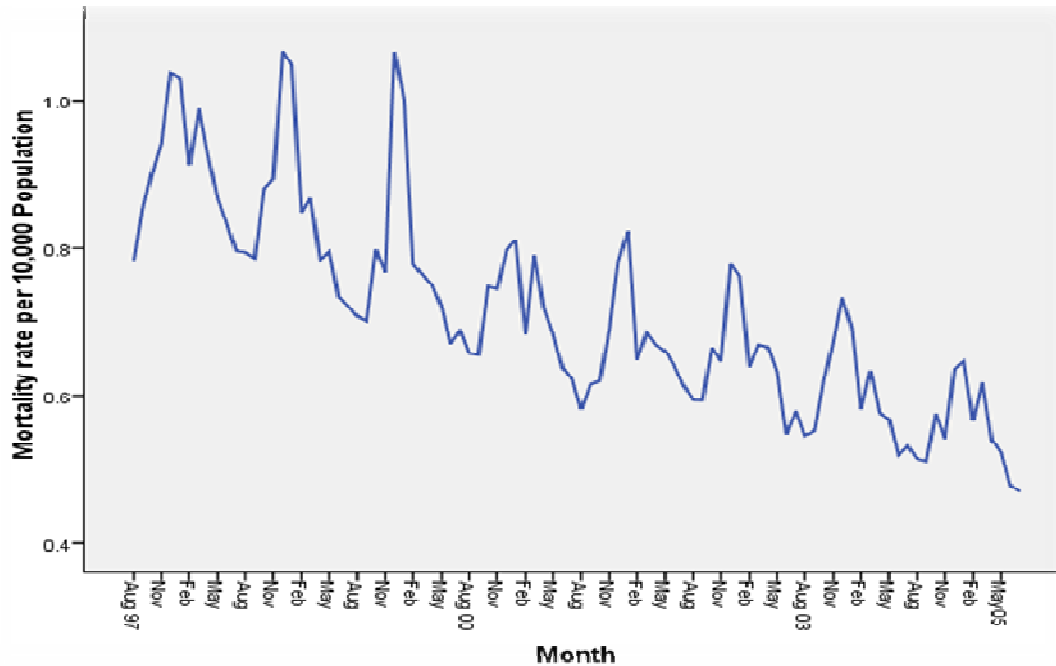

**Figure 1: Mortality rate during the months of the year period**

A sharp rise in mortality is noticed in early November and peaks between December and January (Figure 2). A second rise also occurs around the month of March but the mortality rate seen during this period is not as high as that observed during the December and January months. The lowest mortality rates occurred during July and August months.

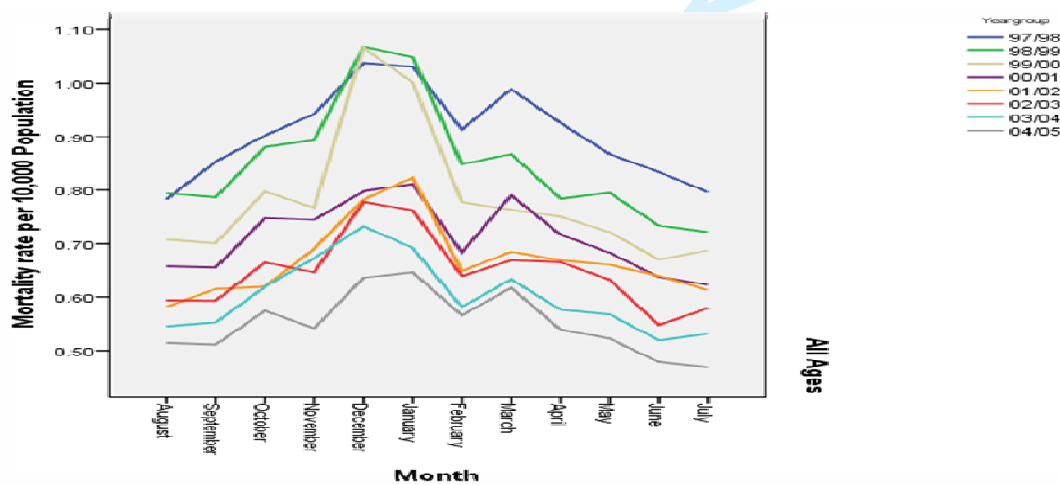

**Figure 2: Relationship between Mean Monthly Temperature and Mortality**

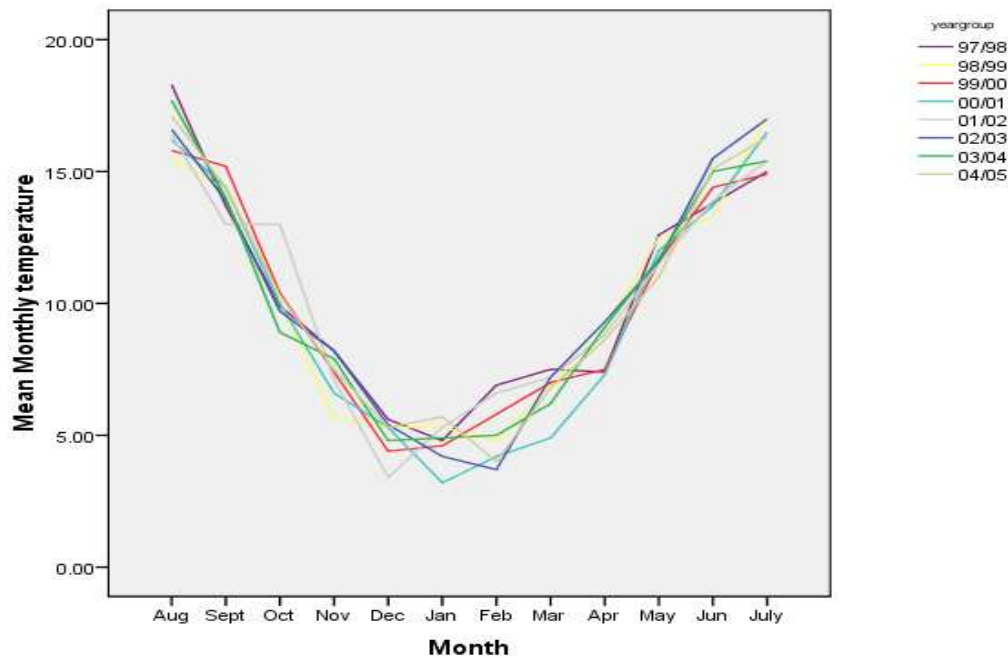

**Figure 3: Mean Monthly Temperature**

A plot of the mean temperatures (figure 3) showed a trough during the months of December to March and when compared to figure 2 this indicates that lower temperatures are observed during the peaks of mortality during the year. A plot of the mean monthly temperature with mortality rate showed a significant negative correlation between the two variables ( $r = -0.479$ ;  $P < 0.0001$ ).

### **Estimation of Excess Winter Mortality due to AMI**

Excess winter mortality was seen in all the years observed. An average of about 2,463 excess winter deaths occurred yearly. In all year periods the highest absolute EWM occurred in those 75 years and above (Table 2). This age group also contribute an average of 70% to the excess winter deaths yearly. The excess winter mortality over the 8 year period resulted in 19,635 total deaths. This is equivalent to 5.5% of the overall yearly mortality due to AMI over the 8 year period.

The excess winter mortality ratio (winter: non-winter rate ratio) is greater than 1 in all year periods considered indicating that there is greater mortality in winter compared to the non-winter months. The excess winter mortality index which describes the risk in dying during

winter compared to non-winter months. This shows that there is an average 17% excess death yearly.

**Table 2: Excess Winter Mortality and index secondary to AMI between 1997-2005**

| Year Period  | EWM (EWMI)    |                |             |             |
|--------------|---------------|----------------|-------------|-------------|
|              | Age:          |                |             |             |
|              | 0 to 64 years | 65 to 74 years | 75 years +  | Total       |
| 97/98        | 244.5(9%)     | 731.5(16%)     | 1716.0(16%) | 2692.0(15%) |
| 98/99        | 281.5(12%)    | 756.0(18%)     | 2280.0(23%) | 3317.5(20%) |
| 99/00        | 333.0(15%)    | 643.5(17%)     | 2715.0(29%) | 3691.5(24%) |
| 00/01        | 148.5(7%)     | 368.5(11%)     | 1332.5(15%) | 1849.5(13%) |
| 01/02        | 258.0(14%)    | 453.0(15%)     | 1372.5(16%) | 2083.5(16%) |
| 02/03        | 196.5(11%)    | 423.0(15%)     | 1430.0(17%) | 2049.5(16%) |
| 03/04        | 251.0(15%)    | 260.0(10%)     | 1339.5(17%) | 1850.5(15%) |
| 04/05        | 140.5(9%)     | 466.0(21%)     | 1494.5(21%) | 2101.0(19%) |
| <b>Total</b> | 1853.5        | 4101.5         | 13680.0     | 19635.0     |

EWM- Excess winter mortality EWMI- Excess winter mortality index

A regression analysis was carried using a negative binomial regression to estimate the excess winter mortality ratio and age (Table 3). The relative risk of excess mortality in age groups 65 to 74 years and 75 years and above was 1.36 and 2.45 respectively compared to the younger age group.

**Table 3: Excess winter mortality ratio and age**

| Age            | coefficient | SE     | Odds ratio       | P-value |
|----------------|-------------|--------|------------------|---------|
| 0 to 64 years  | reference   |        |                  |         |
| 65 to 74 years | 0.308       | 0.0722 | 1.36 (1.18-1.57) | <0.0001 |
| 75 years +     | 0.894       | 0.0629 | 2.45 (2.16-2.77) | <0.0001 |

## Discussion

1  
2  
3 The results from the data analysis showed there is a significant increase in mortality rates due  
4 to AMI during the winter period in England and Wales. In this study, the excess winter  
5 mortality ratio over the 8 year study period for all age groups was 1.17 with a resultant 17%  
6 excess winter deaths for acute myocardial infarction. This amounted to about 20,000 excess  
7 deaths due to this disease. From their analysis of 2266 deaths, Biedrzycki and Baithun<sup>1</sup> in  
8 their study of mortality from myocardial infarction found that December was the peak month  
9 of mortality. A decline was observed from February onwards with the lowest mortality rate  
10 observed during the month of August. This pattern is like what was elicited in this paper: the  
11 highest mortality rates peaked between December and January and lowest mortality rates  
12 were observed during the months of July and August.  
13  
14  
15  
16  
17  
18  
19  
20

21 Besides the demonstrable winter excess, the monthly mortality rate plot showed a double  
22 peak. A peak in mortality, which was clearly above the mean mortality rate, was observed  
23 around the month of March. This second peak in mortality was less than that seen in the  
24 months of December and January.  
25  
26  
27  
28

29 Since fluctuations in daily temperatures could not be appreciated from monthly mean  
30 temperature data, it is possible that absolute low outdoor temperatures may not be the only  
31 factor in causing mortality but rather daily changes in temperature may also be significant. It  
32 has already been established that in most countries in Europe a 1°C drop in temperature is  
33 associated in increasing in mortality<sup>12,13</sup>. Carson et al, in their study found that cardiovascular  
34 diseases were more sensitive to temperature changes than respiratory disease<sup>21</sup>. This  
35 relationship has also been recognized in other studies: Kysely et al<sup>15</sup> found that fluctuations in  
36 daily temperatures resulted in increase in mortality rates of cardiovascular diseases. They also  
37 noted that a second cold spell usually had a lower excess mortality and suggested that the  
38 reason for this might be that some form of acclimatization to the previous cold spell might be  
39 protective against the next. This might explain the double peaks that were observed in this  
40 study. Large variations in temperatures between winter and non-winter months as seen in  
41 countries with warm winters such as England and Wales may also explain the winter paradox  
42 observed in Europe. It is possible that the lack of acclimatization due to the non-persistent  
43 cold weather, unlike in Iceland and Russia, may lead to a greater impact when the winter  
44 season does arrive. However, this is not conclusive and would require more research to  
45 clearly define such an association.  
46  
47  
48  
49  
50  
51  
52  
53  
54  
55  
56  
57  
58  
59  
60

1  
2  
3 The study has shown that AMI has undergone a steady decline in England and Wales over the  
4 years. This is remarkable. The decline of mortality rate from 10.87 deaths per 100,000  
5 population to 6.62 deaths per 10,000 population was observed over the 8 years study period.  
6  
7 The reasons for this may include such factors as better diagnostic and therapeutic procedures,  
8 healthier life styles of the population, and better awareness of the public. Despite this steady  
9 decrease in total yearly mortality rate, the risk of dying from AMI during winter has remained  
10 the same and relatively high over the years. This is suggestive that excess winter mortality is  
11 not a function of the overall mortality. This has important control and prevention  
12 implications: the measures used to control overall mortality may not necessary influence  
13 winter excess.  
14  
15  
16  
17  
18  
19

20  
21 There was a gradient relationship between excess winter deaths and age: we found increasing  
22 winter deaths with increasing age. A regression model was used to estimate the relationship  
23 between age and winter mortality and we found a more than a two-fold increase in risk when  
24 the oldest age group was compared to the youngest. The older age groups seem to be more  
25 vulnerable to the effects of winter and should be an important risk targeted group for  
26 prevention policies and strategies.  
27  
28  
29  
30  
31

32  
33 The excess winter paradox observed across countries in Europe and the identified decline in  
34 winter deaths seen in some countries suggests that significant increases in death during winter  
35 are preventable. The decline observed in excess winter mortality in all age groups, as well as  
36 overall, observed during the 2000-2001 year is quite significant. This period had the lowest  
37 EWMR and also observed the highest percentage drop in EWMR. It also had the least  
38 absolute excess winter death counts among all the year periods studied. A few months earlier  
39 to this particular period, the UK government introduced innovative measures to tackle the  
40 burden of winter excess deaths. These measures were robust interventions incorporated in the  
41 fuel poverty strategy. This sharp drop in EWMR may suggest that these measures may have  
42 had an immediate impact. However, this study cannot conclusively confirm this.  
43 Nevertheless, if these strategies had had an immediate impact, it was definitely short-lived.  
44 This is because while unstable fluctuations in the yearly EWMR were seen in the younger  
45 age groups it seems to be threateningly increasing in age group 75+ and in total, with no  
46 signs of decreasing. In other words, the increased risk of dying during winter due to AMI has  
47 remained high in England and Wales despite the various strategies implemented by the  
48  
49  
50  
51  
52  
53  
54  
55  
56  
57  
58  
59  
60

1  
2  
3 government. It might be that it is too soon to evaluate the impact of these measures or they  
4 may not be effective.  
5  
6  
7

## 8 **Conclusion**

9  
10 This study has shown that seasonal variations in mortality due to acute myocardial infarction  
11 do exist. This is greater during the winter. The excess winter mortality has remained high for  
12 AMI for England and Wales over the years. The study also identified an association between  
13 increasing age and increasing excess winter mortality. There is a possibility that  
14 acclimatization may play a role in the mechanisms that initiate winter deaths.  
15  
16  
17  
18  
19

### 20 **A. Contributor ship Statement**

21  
22 **Find below the contribution of each author**

- 23  
24  
25 • **Osakpolor Ogbemor:** literature review, data analysis and interpretation of  
26 data. Drafting the manuscript, revising manuscript. Approval of the version of  
27 the manuscript to be published
- 28  
29 • **Odugbemi Babatunde:** literature review, drafting the manuscript, revising  
30 manuscript. Approval of the version of the manuscript to be published
- 31  
32 • **Maheswaran Ravi.:** Conception and design of study, acquisition of data,  
33 literature review, revising manuscript. Approval of the version of the  
34 manuscript to be published.
- 35  
36 • **Patel Kavya:** drafting the manuscript, revising manuscript. Approval of the  
37 version of the manuscript to be published.  
38  
39  
40  
41  
42  
43

44 **B. Competing interest:** None

45  
46  
47 **C. Funding:** Self-funded by the authors

48  
49  
50 **D. Data sharing statement:** The data used in this study was obtained from the office of  
51 national statistics, United Kingdom.  
52  
53  
54  
55  
56  
57  
58  
59  
60

## References

1. Biedrzycki, Baithun S. Seasonal variation in mortality from myocardial infarction and haemopericardium. A post-mortem study. *J Clin Pathol*. 2006; 59: 64-66.
2. Sheth T, Nair C, Muller J, Yusuf S. Increased winter mortality from acute myocardial infarction and stroke: the effect of age. *JACC*. 1999; 33(7):1916-9.
3. Spencer F, Goldberg RJ, Becker RC, Gore MJ. Seasonal distribution of acute myocardial infarction in the second national registry of myocardial infarction. *JACC*. 1998; 31(6):1226-33.
4. Curwen M. Excess winter mortality: a British phenomenon? *Health Trends 1990/91*; 22:169-75. In: Aylin P, Morris S, Wakefield J, Grossinho A, Jarup L, Elliot P. Temperature, housing, deprivation and their relationship to excess winter mortality in Great Britain, 1986-1996. *Int J Epidemiol*. 2001; 30: 1100-1108.
5. Healy JD. Excess winter mortality in Europe: a cross country analysis identifying key risk factors. *J Epidemiol Community Health* 2003; 57:784-9.
6. Rumana N, Kita Y, Turin TC et al. Seasonal pattern of incidence and case fatality of acute myocardial infarction in a Japanese population (from the Takashima AMI Registry, 1988 to 2003). *Am J Cardiol*. 2008; 102(10):1307-1311.
7. Sharovsky R, César L. Increase in mortality due to myocardial infarction in the Brazilian City of São Paulo during winter. *Arq Bras Cardiol*. 2002; 78(1): 106-109.
8. Davie GS, G Baker MG, Hales S, Carlin JB. Trends and determinants of excess winter mortality in New Zealand: 1980 to 2000. *BMC Public Health*. 2007; 7:263-272.
9. Curriero FC, Heiner KS, Samet JM, Zeger SL, Strug L, Patz JA. Temperature and mortality in 11 cities of the eastern United States. *Am J Epidemiol* 2002; 155:80-87.
10. Aylin P, Morris S, Wakefield J, Grossinho A, Jarup L, Elliot P. Temperature, housing, deprivation and their relationship to excess winter mortality in Great Britain, 1986-1996. *Int J Epidemiol*. 2001; 30: 1100-1108.
11. Eurowinter Group. Cold exposure and winter mortality from ischaemic heart disease, cerebrovascular disease, respiratory disease, and all causes, in warm and cold regions of Europe. *Lancet*. 1997; 349:1341-1346.
12. Kysely J, Pokorna L, Kyncl J, Kriz B. Excess cardiovascular mortality associated with cold spells in the Czech Republic. *BMC Public Health*. 2009; 9:19.

- 1  
2  
3 13. Kunst AE, Looman CW, Mackenbach JP. Outdoor air temperature and mortality in  
4 The Netherlands: a time-series analysis. *Am J Epidemiol*. 1993; 137(3):331-41.
- 5  
6 14. Laake K, Sverre JM. Winter Excess Mortality: A Comparison between Norway and  
7 England plus Wales. *Age and Ageing*. 1996; 25:343-348.
- 8  
9 15. McKee CM. Deaths in winter: can Britain learn from Europe? *Eur J Epidemiol*. 1989  
10 Jun; 5(2):178-82.
- 11  
12 16. Madjid M, Naghavi M, Litovsky S, Casscells SW. Influenza and cardiovascular  
13 disease: a new opportunity for prevention and the need for further studies. *Circulation*.  
14 2003; 108(22):2730-2736.
- 15  
16 17. Donaldson GC, Keatinge WR. Excess winter mortality: influenza or cold stress?  
17 Observational study. *BMJ*. 2002; 324(7329):89-90.
- 18  
19 18. Clinch JP, Healy JD. Housing standards and excess winter mortality. *J Epidemiol*  
20 *Community Health* 2000; 54:719–20.
- 21  
22 19. Fuel Poverty Team. UK fuel poverty strategy: November 2001 - Ministerial  
23 Foreword. [Accessed 5 Aug 2010]. Available from:  
24 [www.berr.gov.uk/files/file16495.pdf](http://www.berr.gov.uk/files/file16495.pdf).
- 25  
26 20. Anderson RN, M. Miniño AM, Hoyert DL, Rosenberg HM. Comparability of cause  
27 of death between ICD–9 and ICD–10: preliminary estimates. *Natl Vital Stat*. 2001; 49  
28 (2): 1-32.
- 29  
30 21. Carson C, Hajat S, Armstrong B, Wilkinson P. Declining Vulnerability to  
31 Temperature-related Mortality in London over the 20th Century. *Am J Epidemiol*  
32 2006; 164:77–84.
- 33  
34  
35  
36  
37  
38  
39  
40  
41  
42  
43  
44  
45  
46  
47  
48  
49  
50  
51  
52  
53  
54  
55  
56  
57  
58  
59  
60



# BMJ Open

## Seasonal variation in mortality secondary to acute myocardial infarction: a secondary data analysis

|                                 |                                                                                                                                                                                                                                                                                                          |
|---------------------------------|----------------------------------------------------------------------------------------------------------------------------------------------------------------------------------------------------------------------------------------------------------------------------------------------------------|
| Journal:                        | <i>BMJ Open</i>                                                                                                                                                                                                                                                                                          |
| Manuscript ID                   | bmjopen-2017-019242.R1                                                                                                                                                                                                                                                                                   |
| Article Type:                   | Research                                                                                                                                                                                                                                                                                                 |
| Date Submitted by the Author:   | 29-Dec-2017                                                                                                                                                                                                                                                                                              |
| Complete List of Authors:       | Ogbebor, Osakpolor; Saint Peters University Hospital, Internal Medicine Odugbemi , Babatunde; Lagos State University Teaching Hospital (LASUTH)<br>Maheswaran, Ravi; University of Sheffield, School of Health and Related Research<br>Patel, Kavya; Saint Peters University Hospital, Internal Medicine |
| <b>Primary Subject Heading</b>: | Global health                                                                                                                                                                                                                                                                                            |
| Secondary Subject Heading:      | Global health                                                                                                                                                                                                                                                                                            |
| Keywords:                       | Winter mortality, Seasonal Variation, Myocardial infarction < CARDIOLOGY, Fuel poverty, Outdoor Temperature                                                                                                                                                                                              |
|                                 |                                                                                                                                                                                                                                                                                                          |

SCHOLARONE™  
Manuscripts

## Seasonal variation in mortality secondary to acute myocardial infarction: a secondary data analysis

Ogbebor Osakpolor, Saint Peter's University Hospital, USA.  
([osakpolor.ogbebor@yahoo.com](mailto:osakpolor.ogbebor@yahoo.com))

Odugbemi Babatunde, Lagos State University Teaching Hospital, Lagos, Nigeria.  
([babatunde.odugbemi@yahoo.com](mailto:babatunde.odugbemi@yahoo.com))

Maheswaran Ravi, University of Sheffield, Sheffield., UK. ([r.maheswaran@sheffield.ac.uk](mailto:r.maheswaran@sheffield.ac.uk))

Patel Kavya, Saint Peter's University Hospital, USA. ([kavya\\_patel2007@yahoo.co.in](mailto:kavya_patel2007@yahoo.co.in))  
(Corresponding Author)

### Abstract

**Background:** Acute myocardial infarction (AMI) is a leading cause of death globally. Increase in AMI mortality during winter has also been identified in existing literature. This has been associated with low outdoor and indoor temperatures and increasing age. The relationship between AMI and other factors such as gender and socioeconomic factors varies from study to study. Influenza epidemics have also been identified as a contributory factor.

**Objective:** This paper aims to illustrate the seasonal trend in mortality due to AMI in England and Wales with emphasis on excess winter mortality.

**Methods:** Monthly mortality rates per 10,000 population were calculated from data provided by the U.K. Office for National Statistics (ONS) for 1997 to 2005. To quantify the seasonal variation in winter, the excess winter mortality estimates (Excess Winter Mortality (EWM), Excess Winter Mortality Ratio (EWMR), Excess Winter Mortality Index (EWMI) for each year were calculated. Negative binomial regression model was used to estimate the relationship between increasing age and excess winter mortality.

### Results:

The decline in mortality rate for acute myocardial infarction was 6.8% yearly between August 1997 and July 2005. Significant trend for reduction in AMI associated mortality was observed over the period ( $p < 0.001$ ). This decline was not seen with excess winter mortality ( $p < 0.001$ ). 17% excess deaths were observed during winter. This amounted to about 20,000 deaths over the 8 year period. Increasing winter mortality was seen with increasing age for AMI.

1  
2  
3 **Conclusion:** Excess winter mortality secondary to AMI does occur in England and Wales.  
4 Excess winter deaths due to AMI have remained high despite decline in overall mortality.  
5 More research is needed to identify the relationship of sex, temperature, acclimatization and  
6 excess winter deaths due to AMI.  
7  
8  
9

### 10 **Strengths**

- 11 • The data used involved a large sample size and this was able to capture relevant results  
12 in the data analysis and this data represents the population of interest.  
13
- 14 • The paper gives further insight into the concept of excess winter mortality.  
15  
16  
17

### 18 **Limitations**

- 19 • Although the data provided by the ONS was complete and considered accurate, the data  
20 characteristics however restricted the number of variables that could be controlled such  
21 as sex distribution.  
22
- 23 • The population data which was used as denominator would reduce in accuracy as the  
24 year of study moved away from the recent census (29<sup>th</sup> April 2001). This is because the  
25 midyear populations after this date were extrapolated using birth and death data; these  
26 data are prone to their own type of error. However, it is anticipated that the brief period  
27 used in the research was unlikely to experience any dramatic changes in population.  
28  
29  
30  
31  
32  
33  
34  
35  
36  
37  
38  
39  
40  
41  
42  
43  
44  
45  
46  
47  
48  
49  
50  
51  
52  
53  
54  
55  
56  
57  
58  
59  
60

## Background

Studies over time have observed an increase in mortality rate during winter months<sup>1-3</sup>. This appears to be a global phenomenon with evidence of excess winter mortality occurring in a number of European countries, including the United Kingdom<sup>4,5</sup>, Japan<sup>6</sup>, Brazil<sup>7</sup>, Canada<sup>2</sup>, the United States<sup>3</sup>, New Zealand<sup>8</sup> and likely any country where a winter season occurs.

The relationship between mortality and temperature observes a U shape<sup>9</sup>: an increase in mortality is seen with extremes in temperature. Excess winter mortality which is defined as “a significant increase in the number of deaths during winter compared with the average of the non-winter seasons” has been linked to the drop in temperature<sup>10</sup>. Low temperatures have been implicated in the increase in number of deaths during the winter months; however, they are not due to hypothermia. There is evidence to suggest that low temperatures trigger pathological mechanisms that lead to increase in blood pressure and thrombus formation<sup>2</sup>. The consequence of this is the initiation of physiological stress that results in the development of a myocardial infarction or a stroke.

A study involving data from various countries in Europe found a similar association but also identified 18°C as the threshold for this to occur<sup>11</sup>. Research carried out in Scotland<sup>12</sup> and in England<sup>13</sup> could quantify this relationship: a 1°C drop in temperature resulted in a 1-2% increase in the number of deaths. This corresponds to increased odds of dying during the winter by 1.5%<sup>10</sup>.

The effects of temperature are both direct and immediate. Time series analyses have shown that there is a minimum lag time of about 24 hours between drop in temperature and increase in mortality<sup>14</sup>. The impact of cold temperature could also extend over a period of 1 to 2 weeks. This lag time shows that there is a possible mechanism that is initiated by the low outdoor temperatures directly that leads to death supporting evidence from previous studies. It has also been shown that the effect of temperature is significantly potentiated by high relative humidity and strong winds<sup>15</sup>.

There are suggestions that the influence of winters and low temperatures on the “spiked” increase in mortality rates is preventable. This is because there is ecological evidence that countries with colder winters do not have greater excess winter mortality when compared to

1  
2  
3 countries with milder winters<sup>4</sup>, for example the United Kingdom when compared to  
4 Scandinavian countries<sup>16,17</sup>. This observation is referred to as the excess winter paradox.

5  
6 Factors that are considered to play a role include socioeconomic status<sup>17</sup>, influenza<sup>18,19</sup> and  
7 age<sup>16</sup>. Other factors considered include housing insulation and the concept of fuel poverty  
8 both of which affect the indoor temperature. Housing in Britain has lower insulation  
9 properties compared to houses in Germany, Russia or the Scandinavian countries<sup>20</sup>. Due to  
10 the low insulation properties of housing in England and Wales, it is more expensive to warm  
11 these homes when compared to houses in other European states. This introduces the concept  
12 of fuel poverty. Fuel poverty is defined as a situation “*when in order to heat its home to an*  
13 *adequate standard of warmth a household needs to spend more than 10% of its income on*  
14 *total fuel use*<sup>21</sup>.” The World Health Organization’s (WHO) recommendation of adequate  
15 standard warmth is defined as 18°C in occupied rooms and 21°C in living room. The  
16 temperature level of 18°C is remarkable because below this threshold has been identified as  
17 when significant mortality occurs. The ability to generate heat to a surrounding temperature  
18 above this identified threshold might prove necessary. The UK Government has  
19 acknowledged that excess winter mortality is a problem and currently has put in place some  
20 policies to tackle this phenomenon.  
21  
22  
23  
24  
25  
26  
27  
28  
29  
30

31  
32 There are few studies that have taken examined the phenomenon of excess winter mortality  
33 specifically due to AMI in England and Wales. Most studies treat the subject of excess winter  
34 mortality by assessing total mortality without isolating individual diagnosis. Assessing  
35 individual diseases might produce stronger evidence on the impact seasonal variation on a  
36 particular disease condition. Due to the overwhelming global impact of this condition, it is  
37 important to identify seasonal variation of mortality due to AMI and also points of possible  
38 preventive strategies that can help in reducing the incidence of the disease.  
39  
40  
41  
42  
43  
44

## 45 **Methodology**

46  
47 This study was a secondary data analysis that assessed excess winter deaths due to AMI in  
48 England and Wales. The study used anonymised mortality data provided by the office of  
49 National Statistics (ONS), United Kingdom (UK) and mean monthly temperature data  
50 provided by the Meteorological Office, UK. The database provided by the ONS consisted of  
51 anonymised data of daily mortality in England and Wales for the period from 1997 to 2005.  
52 The International Classification of Disease (ICD) was used for coding the various cause of  
53  
54  
55  
56  
57  
58  
59  
60

1  
2  
3 death. The ninth edition (ICD-9) was used from 1997 to 2000 while the tenth edition (ICD-  
4 10) was used between 2001 and 2005. The cause of death considered for the study was acute  
5 myocardial Infarction (ICD-9:410; ICD-10: I21). This was presented in 3 age groups: 0 to 64  
6 years, 65 to 74 years, and 75 years and above. There was no sex distribution provided.  
7  
8  
9

10  
11 Age-specific mortality rates were also calculated for each age group. The daily, monthly, and  
12 yearly mortality rates were calculated and the age specific population served as denominator.  
13 The population data for each year and each age group was extracted from ONS yearly  
14 publications. The monthly rates were standardised to 30 day months.  
15  
16  
17

18  
19 Adjustments in mortality rates were also made to account for changes in ICD coding. This  
20 was done using this formula:  $MA(y, d) = MO(y, d) \cdot R$ . MA is the adjusted daily mortality  
21 (deaths) for a day, d, in year, y. MO is the observed mortality. R is the comparability ratio:  
22 the ICD-10/ICD-9 comparability ratio for acute myocardial infarction 0.9889 was used to  
23 adjust ICD-9 code death counts<sup>22</sup>.  
24  
25  
26  
27

28  
29 Specifically the concept of excess winter deaths was explored in this study. The method used  
30 to analyse the excess winter deaths was first described by Curwen and it is similar to that  
31 used by the ONS<sup>23</sup>. The months of December to March defines the winter period. The non-  
32 winter period is defined as the months of August to November before this winter period, and  
33 the months of April to July following the winter period.  
34  
35  
36  
37

38  
39 In order to quantify the seasonal variation in winter, the excess winter mortality (EWM),  
40 excess winter mortality ratio (EWMR), and the excess winter mortality index (EWMI) for  
41 each year was calculated. The EWM reflects the absolute difference in mortality between the  
42 winter season and non-winter season. Whereas the EWMR represents the relative risk of  
43 death during the winter months compared to the non-winter months. The EWMI represents a  
44 variant of relative risk reduction or “excess”. The EWMR and EWMI are viable tools for  
45 comparisons between age, sex, regions or countries. These estimates were also calculated for  
46 each age group. These estimates were calculated using the following formulae:  
47  
48  
49  
50

- 51 •  $EWM = O - E$
- 52 •  $EWMR = O/E$
- 53 •  $EWMI = (O - E)/E$  or  $EWMR - 1$  (represented as a percentage)
- 54
- 55
- 56
- 57
- 58
- 59
- 60

Where, O is the observed death count. This is the total death counts during the winter months, a period of 4 months, (winter deaths). E is the expected death count which is the total death counts during the non-winter months, a period of 8 months, divided by 2.

Direct correlation between mean monthly temperature and monthly mortality rate was carried out with a significant level set at  $<0.05$ . Addition trend analysis with autoregressive integrated moving average (ARIMA) model and forecasting was done with a significant level  $< 0.05$ .

A regression model was used in assessing the rates of death during the winter season and non-winter seasons. The log-linear model was derived with the mortality count during winter period as the estimated outcome while age was the explanatory variable. The hypothesis was to test if there was any difference between excess winter mortality ratios amongst the various age groups. Therefore, the log of the average non-winter deaths was used as offset to fit the model. The model was fitted using a negative binomial model with a log link function due to over dispersion in the initial analysis. All analysis was carried out using the Statistical package for social sciences (SPSS) version 19. Significant p – value was defined as less than 0.05.

## Results

**Table: 1 Yearly mortality patterns of AMI from August 1997 to July 2005.**

| Year Period* | Mortality Rate per 10,000 (Number of deaths) |                |                    |               |
|--------------|----------------------------------------------|----------------|--------------------|---------------|
|              | Age:                                         |                |                    |               |
|              | 0 to 64 years                                | 65 to 74 years | 75 years and above | Total         |
| 97/98        | 1.96 (8184)                                  | 24.72 (14299)  | 83.59 (33678)      | 10.87 (56161) |
| 98/99        | 1.81 (7581)                                  | 22.59 (13119)  | 79.84 (32283)      | 10.22 (52983) |
| 99/00        | 1.64 (6924)                                  | 20.11 (11724)  | 74.70 (30330)      | 9.41 (48978)  |
| 00/01        | 1.52 (6435)                                  | 17.99 (10528)  | 67.98 (27716)      | 8.55 (44679)  |
| 01/02        | 1.40 (5964)                                  | 16.28 (9567)   | 65.00 (26610)      | 8.03 (42141)  |
| 02/03        | 1.35 (5784)                                  | 14.71 (8685)   | 64.45 (26495)      | 7.77 (40964)  |
| 03/04        | 1.21 (5189)                                  | 13.39 (7937)   | 60.84 (25125)      | 7.22 (38251)  |
| 04/05        | 1.16 (5005)                                  | 11.84 (7066)   | 55.79 (23180)      | 6.62 (35251)  |
| <b>Total</b> | 1.51 (51066)                                 | 17.70 (82925)  | 69.02 (225417)     | 8.59 (359408) |

1  
2  
3 Between August 1997 and July 2005 there were 359,408 deaths due to acute myocardial  
4 infarction (AMI) with an average death count of 44,926 occurring yearly (Table 1). 62.7% of  
5 the total deaths were seen in the age group 75 years and above, 23.1% in age group 65 to 74  
6 years and 14.2% in age group 0 to 64 years. A steady decline in the absolute death counts as  
7 well as mortality rates were seen in all age groups across the years (Figure 1). Overall, the  
8 decline in mortality rate for acute myocardial infarction was 6.8% yearly between August  
9 1997 and July 2005.  
10  
11  
12  
13  
14

15  
16 A sharp rise in mortality is noticed in early November and peaks between December and  
17 January (Figure 2). A second rise also occurs around the month of March but the mortality  
18 rate seen during this period is not as high as that observed during the December and January  
19 months. The lowest mortality rates occurred during July and August months.  
20  
21  
22

23  
24 A plot of the mean temperatures in Celsius (figure 3) showed a trough during the months of  
25 December to March and when compared to figure 2 this indicates that lower temperatures are  
26 observed during the peaks of mortality during the year. A plot of the mean monthly  
27 temperature with mortality rate showed a significant negative correlation between the two  
28 variables ( $r = -0.479$ ;  $P < 0.0001$ ).  
29  
30  
31  
32

### 33 **Estimation of Excess Winter Mortality due to AMI**

34  
35 Excess winter mortality was seen in all the years observed. An average of about 2,463 excess  
36 winter deaths occurred yearly. In all year periods the highest absolute EWM occurred in  
37 those 75 years and above (Table 2). This age group also contribute an average of 70% to the  
38 excess winter deaths yearly. The excess winter mortality over the 8 year period resulted in  
39 19,635 total deaths. This is equivalent to 5.5% of the overall yearly mortality due to AMI  
40 over the 8 year period.  
41  
42  
43  
44  
45

46  
47 The excess winter mortality ratio (winter: non-winter rate ratio) is greater than 1 in all year  
48 periods considered, indicating that there is greater mortality in winter compared to the non-  
49 winter months (Table 3). The excess winter mortality ratio describes the risk in dying during  
50 winter compared to non-winter months. This can also be represented as a percentage (Excess  
51 winter mortality index). This shows that there is an average 17% excess death yearly (Table  
52 2).  
53  
54  
55  
56  
57  
58  
59  
60



**Table 2: Excess Winter Mortality and index secondary to AMI between 1997-2005**

| Year Period  | EWM (EWMI)    |                |              |              |
|--------------|---------------|----------------|--------------|--------------|
|              | Age:          |                |              |              |
|              | 0 to 64 years | 65 to 74 years | 75 years +   | Total        |
| 97/98        | 244.5(9%)     | 731.5(16%)     | 1716.0(16%)  | 2692.0(15%)  |
| 98/99        | 281.5(12%)    | 756.0(18%)     | 2280.0(23%)  | 3317.5(20%)  |
| 99/00        | 333.0(15%)    | 643.5(17%)     | 2715.0(29%)  | 3691.5(24%)  |
| 00/01        | 148.5(7%)     | 368.5(11%)     | 1332.5(15%)  | 1849.5(13%)  |
| 01/02        | 258.0(14%)    | 453.0(15%)     | 1372.5(16%)  | 2083.5(16%)  |
| 02/03        | 196.5(11%)    | 423.0(15%)     | 1430.0(17%)  | 2049.5(16%)  |
| 03/04        | 251.0(15%)    | 260.0(10%)     | 1339.5(17%)  | 1850.5(15%)  |
| 04/05        | 140.5(9%)     | 466.0(21%)     | 1494.5(21%)  | 2101.0(19%)  |
| <b>Total</b> | 1853.5(11%)   | 4101.5(16%)    | 13680.0(19%) | 19635.0(17%) |

**Table 3. Excess Winter Mortality Ratio secondary to AMI between 1997-2005**

| Year Period        | Excess winter mortality ratio (CI) |                   |                   |                   |
|--------------------|------------------------------------|-------------------|-------------------|-------------------|
|                    | Age:                               |                   |                   |                   |
|                    | 0 to 64 years                      | 65 to 74 years    | 75 years +        | Total             |
| 97/98              | 1.09 (1.07, 1.11)                  | 1.16 (1.15, 1.18) | 1.16 (1.15, 1.17) | 1.15 (1.14, 1.16) |
| 98/99              | 1.12 (1.09, 1.14)                  | 1.18 (1.17, 1.20) | 1.23 (1.22, 1.24) | 1.20 (1.19, 1.21) |
| 99/00              | 1.15 (1.13, 1.17)                  | 1.17 (1.16, 1.19) | 1.29 (1.28, 1.31) | 1.24 (1.24, 1.25) |
| 00/01              | 1.07 (1.05, 1.09)                  | 1.11 (1.09, 1.13) | 1.15 (1.14, 1.16) | 1.13 (1.12, 1.14) |
| 01/02              | 1.14 (1.11, 1.16)                  | 1.15 (1.13, 1.17) | 1.16 (1.15, 1.17) | 1.16 (1.15, 1.17) |
| 02/03              | 1.11 (1.08, 1.13)                  | 1.15 (1.13, 1.17) | 1.17 (1.16, 1.18) | 1.16 (1.15, 1.17) |
| 03/04              | 1.15 (1.13, 1.18)                  | 1.10 (1.08, 1.12) | 1.17 (1.16, 1.18) | 1.15 (1.14, 1.16) |
| 04/05              | 1.09 (1.06, 1.11)                  | 1.21 (1.19, 1.23) | 1.21 (1.19, 1.22) | 1.19 (1.18, 1.20) |
| <b>All periods</b> | 1.11 (1.10, 1.13)                  | 1.16 (1.14, 1.17) | 1.19 (1.18, 1.20) | 1.17 (1.17, 1.18) |

A regression analysis was carried using a negative binomial regression to estimate the excess winter mortality ratio and age (Table 4). The relative risk of excess mortality in age groups 65 to 74 years and 75 years and above was 1.36 and 2.45 respectively compared to the younger age group.

**Table 4: Excess winter mortality ratio and age**

| Age            | coefficient | EWM(%) | Relative risk    | P-value |
|----------------|-------------|--------|------------------|---------|
| 0 to 64 years  | reference   | 11     |                  |         |
| 65 to 74 years | 0.308       | 16     | 1.36 (1.18-1.57) | <0.0001 |
| 75 years +     | 0.894       | 19     | 2.45 (2.16-2.77) | <0.0001 |

Figure 4 shows the trend of mortality rate and excess winter mortality index (EWMI) secondary to AMI. There is a steady decline in mortality rate with a significant trend for reduction in AMI associated mortality observed over the period studied ( $p < 0.001$ ). The forecast for the next 11 year periods shows a continued decline. The forecast for the EWMI shows no change and remains relatively the same ( $p < 0.001$ ).

## Discussion

The results from the data analysis showed there is a significant increase in mortality rates due to AMI during the winter period in England and Wales. In this study, the excess winter mortality ratio over the 8 year study period for all age groups was 1.17 with a resultant 17% excess winter deaths for acute myocardial infarction. This amounted to about 20,000 excess deaths due to this disease. From their analysis of 2266 deaths, Biedrzycki and Baithun<sup>1</sup> in their study of mortality from myocardial infarction found that December was the peak month of mortality. A decline was observed from February onwards with the lowest mortality rate observed during the month of August. This pattern is similar to what was elicited in this paper: the highest mortality rates peaked between December and January and lowest mortality rates were observed during the months of July and August.

Besides the demonstrable winter excess, the monthly mortality rate plot showed a double peak. A peak in mortality, which was clearly above the mean mortality rate, was observed around the month of March. This second peak in mortality was less than that seen in the months of December and January.

Since fluctuations in daily temperatures could not be appreciated from monthly mean temperature data, it is possible that absolute low outdoor temperatures may not be the only factor in causing mortality but rather daily changes in temperature may also be significant. It

1  
2  
3 has already been established that in most countries in Europe a 1°C drop in temperature is  
4 associated in increasing in mortality<sup>12,13</sup>. Carson et al, in their study found that cardiovascular  
5 diseases were more sensitive to temperature changes than respiratory disease<sup>24</sup>. This  
6 relationship has also been recognized in other studies: Kysely et al<sup>14</sup> found that fluctuations in  
7 daily temperatures resulted in increase in mortality rates of cardiovascular diseases. They also  
8 noted that a second cold spell usually had a lower excess mortality and suggested that the  
9 reason for this might be that some form of acclimatization to the previous cold spell might be  
10 protective against the next. This might explain the double peaks that were observed in this  
11 study. Large variations in temperatures between winter and non-winter months as seen in  
12 countries with warm winters such as England and Wales may also explain the winter paradox  
13 observed in Europe. It is possible that the lack of acclimatization due to the non-persistent  
14 cold weather, unlike in Iceland and Russia, may lead to a greater impact when the winter  
15 season does arrive. However, this is not conclusive and would require more research to  
16 clearly define such an association.  
17  
18  
19  
20  
21  
22  
23  
24  
25  
26

27 The study has shown that AMI has undergone a steady decline in England and Wales over the  
28 years. This is remarkable. The decline of mortality rate from 10.87 deaths per 100,000  
29 population to 6.62 deaths per 10,000 population was observed over the 8 years study period.  
30 This was statistically significant. The reasons for this may include such factors as better  
31 diagnostic and therapeutic procedures, healthier life styles of the population, and better  
32 awareness of the public. Despite this steady decrease in total yearly mortality rate, the risk of  
33 dying from AMI during winter has remained the same. This is suggestive that excess winter  
34 mortality is not a function of the overall mortality. This has important control and prevention  
35 implications: the measures used to control overall mortality may not necessary influence  
36 winter excess.  
37  
38  
39  
40  
41  
42  
43  
44

45 There are several factors which could be possibly associated with excess winter mortality and  
46 this may include seasonal variations in solar ultraviolet-B (UVB) doses and serum 25-  
47 hydroxyvitamin D [25(OH)D] concentrations, gene expression, ambient temperature and  
48 humidity, UVB effects on environmental pathogen load, environmental pollutants and  
49 allergens, and photoperiod (or length of day)<sup>25</sup>. Amongst these factors, possibly 25(OH)D  
50 concentration (<20 ng/ml) would be modifiable risk factor and its supplementation might  
51 reduce death rates significantly in winter months. Several RCTs are ongoing and these will  
52  
53  
54  
55  
56  
57  
58  
59  
60

1  
2  
3 provide results to clarify whether vitamin D deficiency as a causal and reversible factor to  
4 prevent cardiovascular disease.  
5  
6

7  
8 There was a gradient relationship between excess winter deaths and age: we found increasing  
9 winter deaths with increasing age. A regression model was used to estimate the relationship  
10 between age and winter mortality and we found a more than a two-fold increase in risk when  
11 the oldest age group was compared to the youngest. The older age groups seem to be more  
12 vulnerable to the effects of winter and should be an important risk targeted group for  
13 prevention policies and strategies.  
14  
15  
16  
17

18  
19 The excess winter paradox observed across countries in Europe and the identified decline in  
20 winter deaths seen in some countries suggests that significant increases in death during winter  
21 are preventable. The decline observed in excess winter mortality in all age groups, as well as  
22 overall, observed during the 2000-2001 year is interesting. This period had the lowest  
23 EWMR and also observed the highest percentage drop in EWMR. It also had the least  
24 absolute excess winter death counts among all the year periods studied. A few months  
25 earlier, the UK government introduced innovative measures to tackle the burden of winter  
26 excess deaths. These measures were robust interventions incorporated in the fuel poverty  
27 strategy. This sharp drop in EWMR may suggest that these measures may have had an  
28 immediate impact. However, this study cannot conclusively confirm this. Nevertheless, if  
29 these strategies had had an immediate impact, it was definitely short-lived. This is because  
30 despite the fluctuations the trend has remained the same. In other words, the increased risk of  
31 dying during winter due to AMI has remained high in England and Wales despite the various  
32 strategies implemented by the government, and the trend analysis shows that it will remain so  
33 for a couple of years. It might be that it is too soon to evaluate the impact of these measures  
34 or they may not be effective.  
35  
36  
37  
38  
39  
40  
41  
42  
43  
44  
45

## 46 **Conclusion**

47  
48 This study has shown that increased winter mortality due to acute myocardial infarction do  
49 exist. The excess winter mortality has remained high for AMI for England and Wales over  
50 the years. The study also identified an association between increasing age and increasing  
51 excess winter mortality. There is a possibility that acclimatization may play a role in the  
52 mechanisms that initiate winter deaths.  
53  
54  
55  
56  
57  
58  
59  
60

## Figure Legends

**Figure 1:** Showing a decline in mortality rate due to AMI over the year periods

**Figure 2** Showing variation in mortality rate over the months over the year periods

**Figure 3:** A plot of the mean monthly temperatures in Celsius with an obvious deep in temperatures during the months of December to March

**Figure 4:** Trend in mortality rate and excess winter mortality index over the year period observed and forecast for the next 11 years. There is a steady decline in mortality rate with a significant trend for reduction in AMI associated mortality. The forecast for the next 11 year periods shows a continued decline. The forecast for the EWMI shows no change.

### A. Contributor ship Statement

Find below the contribution of each author

- **Osakpolor Ogbemor:** literature review, data analysis and interpretation of data. Drafting the manuscript, revising manuscript. Approval of the version of the manuscript to be published
- **Odugbemi Babatunde:** literature review, drafting the manuscript, revising manuscript. Approval of the version of the manuscript to be published
- **Maheswaran Ravi.:** Conception and design of study, acquisition of data, literature review, revising manuscript. Approval of the version of the manuscript to be published.
- **Patel Kavya:** drafting the manuscript, revising manuscript. Approval of the version of the manuscript to be published.

**B. Competing interest:** None

**C. Funding:** Self-funded by the authors

**D. Data sharing statement:** The data used in this study was obtained from the office of national statistics, United Kingdom.

## References

1. Biedrzycki, Baithun S. Seasonal variation in mortality from myocardial infarction and haemopericardium. A post-mortem study. *J Clin Pathol*. 2006; 59: 64-66.
2. Sheth T, Nair C, Muller J, Yusuf S. Increased winter mortality from acute myocardial infarction and stroke: the effect of age. *JACC*. 1999; 33(7):1916–9.
3. Spencer F, Goldberg RJ, Becker RC, Gore MJ. Seasonal distribution of acute myocardial infarction in the second national registry of myocardial infarction. *JACC*. 1998; 31(6):1226–33.
4. Curwen M. Excess winter mortality: a British phenomenon? *Health Trends 1990/91*; 22:169-75. In: Aylin P, Morris S, Wakefield J, Grossinho A, Jarup L, Elliot P. Temperature, housing, deprivation and their relationship to excess winter mortality in Great Britain, 1986-1996. *Int J Epid*. 2001; 30: 1100-1108.
5. Healy JD. Excess winter mortality in Europe: a cross country analysis identifying key risk factors. *J Epidemiol Community Health* 2003; 57:784–9.
6. Rumana N, Kita Y, Turin TC et al. Seasonal pattern of incidence and case fatality of acute myocardial infarction in a Japanese population (from the Takashima AMI Registry, 1988 to 2003). *Am J Cardiol*. 2008; 102(10):1307-1311.
7. Sharovsky R, César L. Increase in mortality due to myocardial infarction in the Brazilian City of São Paulo during winter. *Arq Bras Cardiol*. 2002; 78(1): 106-109.
8. Davie GS, G Baker MG, Hales S, Carlin JB. Trends and determinants of excess winter mortality in New Zealand: 1980 to 2000. *BMC Public Health*. 2007; 7:263-272.
9. Curriero FC, Heiner KS, Samet JM, Zeger SL, Strug L, Patz JA. Temperature and mortality in 11 cities of the eastern United States. *Am J Epidemiol* 2002; 155:80-87.
10. Aylin P, Morris S, Wakefield J, Grossinho A, Jarup L, Elliot P. Temperature, housing, deprivation and their relationship to excess winter mortality in Great Britain, 1986-1996. *Int J Epid*. 2001; 30: 1100-1108.
11. Eurowinter Group. Cold exposure and winter mortality from ischaemic heart disease, cerebrovascular disease, respiratory disease, and all causes, in warm and cold regions of Europe. *Lancet*. 1997; 349:1341–1346.
12. Gemmell I, McLoone P, Boddy FA, et al. Seasonal variation in mortality in Scotland. *Int J Epidemiol* 2000; 29:274–9

13. Bhaskaran K, Hajat S, Haines A, Herrett E, Wilkinson P, Smeeth L. Short term effects of temperature on risk of myocardial infarction in England and Wales: time series regression analysis of the Myocardial Ischaemia National Audit Project (MINAP) registry. *BMJ*. 2010; 341:c3720.
14. Kysely J, Pokorna L, Kyncl J, Kriz B. Excess cardiovascular mortality associated with cold spells in the Czech Republic. *BMC Public Health*. 2009; 9:19.
15. Kunst AE, Looman CW, Mackenbach JP. Outdoor air temperature and mortality in The Netherlands: a time-series analysis. *Am J Epidemiol*. 1993; 137(3):331-41.
16. Laake K, Sverre JM. Winter Excess Mortality: A Comparison between Norway and England plus Wales. *Age and Ageing*. 1996; 25:343-348.
17. McKee CM. Deaths in winter: can Britain learn from Europe? *Eur J Epidemiol*. 1989 Jun; 5(2):178-82.
18. Madjid M, Naghavi M, Litovsky S, Casscells SW. Influenza and cardiovascular disease: a new opportunity for prevention and the need for further studies. *Circulation*. 2003; 108(22):2730-2736.
19. Donaldson GC, Keatinge WR. Excess winter mortality: influenza or cold stress? Observational study. *BMJ*. 2002; 324(7329):89-90.
20. Clinch JP, Healy JD. Housing standards and excess winter mortality. *J Epidemiol Community Health* 2000; 54:719–20.
21. Fuel Poverty Team. UK fuel poverty strategy: November 2001 - Ministerial Foreword. [Accessed 5 Aug 2010]. Available from: [www.berr.gov.uk/files/file16495.pdf](http://www.berr.gov.uk/files/file16495.pdf).
22. Anderson RN, M. Miniño AM, Hoyert DL, Rosenberg HM. Comparability of cause of death between ICD–9 and ICD–10: preliminary estimates. *Natl Vital Stat*. 2001; 49 (2): 1-32.
23. Johnson H, Griffiths C. Estimating excess winter mortality in England and Wales. *Health Statistics Quarterly*. 2003; 20: 19–24.
24. Carson C, Hajat S, Armstrong B, Wilkinson P. Declining Vulnerability to Temperature-related Mortality in London over the 20th Century. *Am J Epidemiol* 2006; 164:77–84.
25. Grant WB, Bhottoa HP, Boucher BJ. Seasonal variations of U.S. mortality rates: Roles of solar ultraviolet-B doses, vitamin D, gene expression, and infections. *J Steroid Biochem Mol Biol*. 2017 Oct;173:5-12.

1  
2  
3  
4  
5  
6  
7  
8  
9  
10  
11  
12  
13  
14  
15  
16  
17  
18  
19  
20  
21  
22  
23  
24  
25  
26  
27  
28  
29  
30  
31  
32  
33  
34  
35  
36  
37  
38  
39  
40  
41  
42  
43  
44  
45  
46  
47  
48  
49  
50  
51  
52  
53  
54  
55  
56  
57  
58  
59  
60

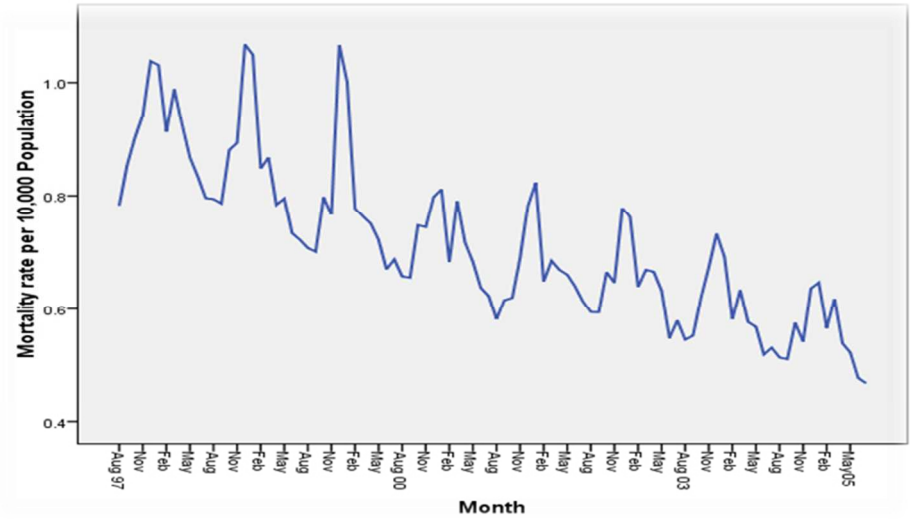

Figure 1: Mortality rate during the months of the year period

Figure 1: Showing a decline in mortality rate due to AMI over the year periods

147x98mm (150 x 150 DPI)

view only



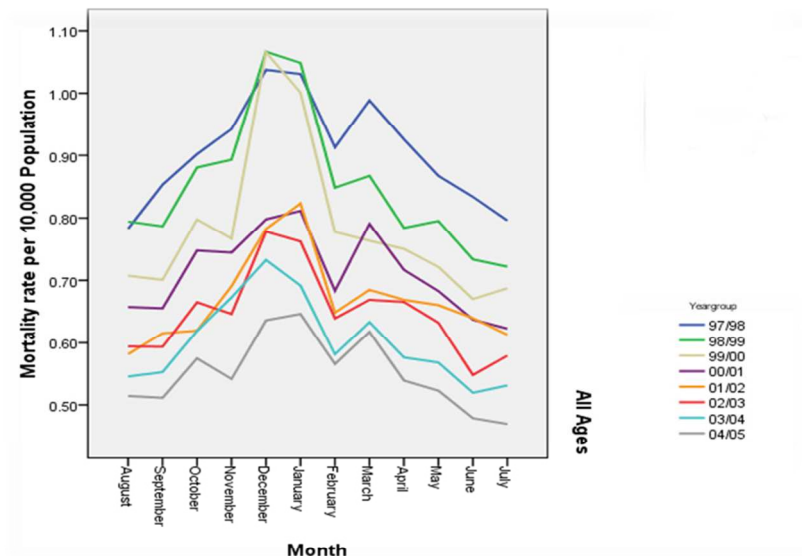

Figure 2: Mortality rate during months over the year periods

Figure 2 showing variation in mortality rate over the months over the year periods

174x128mm (150 x 150 DPI)

1  
2  
3  
4  
5  
6  
7  
8  
9  
10  
11  
12  
13  
14  
15  
16  
17  
18  
19  
20  
21  
22  
23  
24  
25  
26  
27  
28  
29  
30  
31  
32  
33  
34  
35  
36  
37  
38  
39  
40  
41  
42  
43  
44  
45  
46  
47  
48  
49  
50  
51  
52  
53  
54  
55  
56  
57  
58  
59  
60

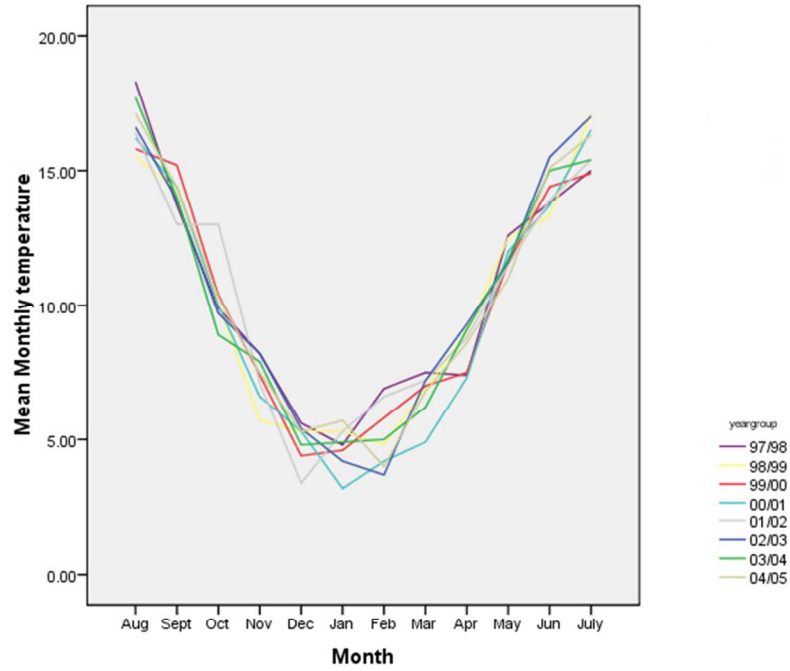

Figure 3: Mean Monthly Temperature over the year periods

Figure 3: A plot of the mean monthly temperatures in Celsius with an obvious deep in temperatures during the months of December to March

190x179mm (96 x 96 DPI)

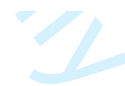

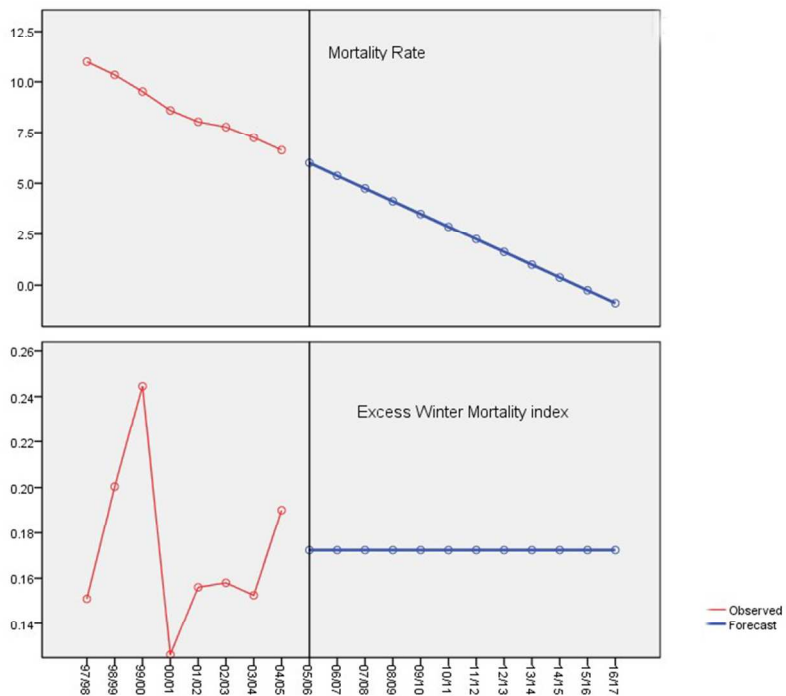

Figure 4: Trend of mortality rate and excess winter mortality index over the observed period and forecast

Figure 4: Trend in mortality rate and excess winter mortality index over the year period observed and forecast for the next 11 years. There is a steady decline in mortality rate with a significant trend for reduction in AMI associated mortality. The forecast for the next 11 year periods shows a continued decline. The forecast for the EWMI shows no change .

239x210mm (96 x 96 DPI)

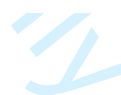

# BMJ Open

## Seasonal variation in mortality secondary to acute myocardial infarction in England and Wales: a secondary data analysis

|                                 |                                                                                                                                                                                                                                                                                                          |
|---------------------------------|----------------------------------------------------------------------------------------------------------------------------------------------------------------------------------------------------------------------------------------------------------------------------------------------------------|
| Journal:                        | <i>BMJ Open</i>                                                                                                                                                                                                                                                                                          |
| Manuscript ID                   | bmjopen-2017-019242.R2                                                                                                                                                                                                                                                                                   |
| Article Type:                   | Research                                                                                                                                                                                                                                                                                                 |
| Date Submitted by the Author:   | 01-Feb-2018                                                                                                                                                                                                                                                                                              |
| Complete List of Authors:       | Ogbebor, Osakpolor; Saint Peters University Hospital, Internal Medicine Odugbemi , Babatunde; Lagos State University Teaching Hospital (LASUTH)<br>Maheswaran, Ravi; University of Sheffield, School of Health and Related Research<br>Patel, Kavya; Saint Peters University Hospital, Internal Medicine |
| <b>Primary Subject Heading</b>: | Public health                                                                                                                                                                                                                                                                                            |
| Secondary Subject Heading:      | Cardiovascular medicine, Nutrition and metabolism, Health policy, Public health                                                                                                                                                                                                                          |
| Keywords:                       | Winter mortality, Seasonal Variation, Myocardial infarction < CARDIOLOGY, Fuel poverty, Outdoor Temperature                                                                                                                                                                                              |
|                                 |                                                                                                                                                                                                                                                                                                          |

SCHOLARONE™  
Manuscripts

Only

## Seasonal variation in mortality secondary to acute myocardial infarction in England and Wales: a secondary data analysis

Ogbebor Osakpolor, Saint Peter's University Hospital, USA.  
([osakpolor.ogbebor@yahoo.com](mailto:osakpolor.ogbebor@yahoo.com))

Odugbemi Babatunde, Lagos State University Teaching Hospital, Lagos, Nigeria.  
([babatunde.odugbemi@yahoo.com](mailto:babatunde.odugbemi@yahoo.com))

Maheswaran Ravi, University of Sheffield, Sheffield., UK. ([r.maheswaran@sheffield.ac.uk](mailto:r.maheswaran@sheffield.ac.uk))

Patel Kavya, Saint Peter's University Hospital, USA. ([kavya\\_patel2007@yahoo.co.in](mailto:kavya_patel2007@yahoo.co.in))  
(Corresponding Author)

### Abstract

**Background:** Acute myocardial infarction (AMI) is a leading cause of death globally. Increase in AMI mortality during winter has also been identified in existing literature. This has been associated with low outdoor and indoor temperatures and increasing age. The relationship between AMI and other factors such as gender and socioeconomic factors varies from study to study. Influenza epidemics have also been identified as a contributory factor.

**Objective:** This paper aims to illustrate the seasonal trend in mortality due to AMI in England and Wales with emphasis on excess winter mortality.

**Methods:** Monthly mortality rates per 10,000 population were calculated from data provided by the U.K. Office for National Statistics (ONS) for 1997 to 2005. To quantify the seasonal variation in winter, the excess winter mortality estimates (Excess Winter Mortality (EWM), Excess Winter Mortality Ratio (EWMR), Excess Winter Mortality Index (EWMI) for each year were calculated. Negative binomial regression model was used to estimate the relationship between increasing age and excess winter mortality.

### Results:

The decline in mortality rate for acute myocardial infarction was 6.8% yearly between August 1997 and July 2005. Significant trend for reduction in AMI associated mortality was observed over the period ( $p < 0.001$ ). This decline was not seen with excess winter mortality ( $p < 0.001$ ). 17% excess deaths were observed during winter. This amounted to about 20,000 deaths over the 8 year period. Increasing winter mortality was seen with increasing age for AMI.

1  
2  
3 **Conclusion:** Excess winter mortality secondary to AMI does occur in England and Wales.  
4 Excess winter deaths due to AMI have remained high despite decline in overall mortality.  
5 More research is needed to identify the relationship of sex, temperature, acclimatization,  
6 vitamin D and excess winter deaths due to AMI.  
7  
8  
9

### 10 11 **Strengths**

- 12 • The data used involved a large sample size and this was able to capture relevant results  
13 in the data analysis and this data represents the population of interest.
- 14 • The paper gives further insight into the concept of excess winter mortality.  
15  
16  
17

### 18 19 **Limitations**

- 20 • Although the data provided by the ONS was complete and considered accurate, the data  
21 characteristics however restricted the number of variables that could be controlled such  
22 as sex distribution.
- 23 • The population data which was used as denominator would reduce in accuracy as the  
24 year of study moved away from the recent census (29<sup>th</sup> April 2001). This is because the  
25 midyear populations after this date were extrapolated using birth and death data; these  
26 data are prone to their own type of error. However, it is anticipated that the brief period  
27 used in the research was unlikely to experience any dramatic changes in population.  
28  
29  
30  
31  
32  
33  
34  
35  
36  
37  
38  
39  
40  
41  
42  
43  
44  
45  
46  
47  
48  
49  
50  
51  
52  
53  
54  
55  
56  
57  
58  
59  
60

## Background

Studies over time have observed an increase in mortality rate during winter months<sup>1-3</sup>. This appears to be a global phenomenon with evidence of excess winter mortality occurring in a number of countries, including the United Kingdom<sup>4,5</sup>, Japan<sup>6</sup>, Brazil<sup>7</sup>, Canada<sup>2</sup>, the United States<sup>3</sup> and New Zealand<sup>8</sup>.

The relationship between mortality and temperature observes a U shape<sup>9</sup>: an increase in mortality is seen with extremes in temperature. Excess winter mortality which is defined as “a significant increase in the number of deaths during winter compared with the average of the non-winter seasons” has been linked to the drop in temperature<sup>10</sup>. Low temperatures have been implicated in the increase in number of deaths during the winter months; however, they are not due to hypothermia. There is evidence to suggest that low temperatures trigger pathological mechanisms that lead to increase in blood pressure and thrombus formation<sup>2</sup>. The consequence of this is the initiation of physiological stress that results in the development of a myocardial infarction or a stroke. A study involving data from various countries in Europe found a similar association but also identified 18°C as the threshold for this to occur<sup>11</sup>. Research carried out in Scotland<sup>12</sup> and in England<sup>13</sup> could quantify this relationship: a 1°C drop in temperature resulted in a 1-2% increase in the number of deaths. This corresponds to increased odds of dying during the winter by 1.5%<sup>10</sup>.

The effects of temperature are both direct and immediate. Time series analyses have shown that there is a minimum lag time of about 24 hours between drop in temperature and increase in mortality<sup>14</sup>. The impact of cold temperature could also extend over a period of 1 to 2 weeks. This lag time shows that there is a possible mechanism that is initiated by the low outdoor temperatures directly that leads to death supporting evidence from previous studies. It has also been shown that the effect of temperature is significantly potentiated by high relative humidity and strong winds<sup>15</sup>.

There are suggestions that the influence of winters and low temperatures on the increase in mortality rates is preventable. This is because there is ecological evidence that countries with colder winters do not have greater excess winter mortality when compared to countries with milder winters<sup>4</sup>, for example the United Kingdom when compared to Scandinavian countries<sup>16,17</sup>. This observation is referred to as the excess winter paradox.

1  
2  
3  
4  
5  
6  
7  
8  
9  
10  
11  
12  
13  
14  
15  
16  
17  
18  
19  
20  
21  
22  
23  
24  
25  
26  
27  
28  
29  
30  
31  
32  
33  
34  
35  
36  
37  
38  
39  
40  
41  
42  
43  
44  
45  
46  
47  
48  
49  
50  
51  
52  
53  
54  
55  
56  
57  
58  
59  
60

Housing insulation and the concept of fuel poverty, both of which affect the indoor temperature, are some of the factors thought to be responsible for the paradox. Housing in Britain has lower insulation properties compared to houses in Germany, Russia or the Scandinavian countries<sup>18</sup>. Due to the low insulation properties of housing in England and Wales, it is more expensive to warm these homes when compared to houses in other European states. This introduces the concept of fuel poverty. Fuel poverty is defined as a situation “*when in order to heat its home to an adequate standard of warmth a household needs to spend more than 10% of its income on total fuel use*<sup>19</sup>.” The World Health Organization’s (WHO) recommendation of adequate standard warmth is defined as 18°C in occupied rooms and 21°C in living room. The temperature level of 18°C is remarkable because below this threshold has been identified as when significant mortality occurs. The ability to generate heat to a surrounding temperature above this identified threshold might prove necessary. A behavioural component may also be contributory to the paradox. For example people living in warmer winters such as United Kingdom and Portugal were less likely to heat the living and bedroom to recommended levels when outdoor temperature drops<sup>11</sup>. This is a marked contrast to persons living in countries like Russia<sup>20</sup> who maintained their indoor temperatures at 20.9°C and 24.2°C when the temperature outside was 7°C. Studies also show that people in the United Kingdom were also less likely to wear protective clothing such as hats, heavy jackets and gloves<sup>11</sup>. The UK Government has acknowledged that excess winter mortality is a problem and currently has put in place policies to tackle this phenomenon.

Other factors that are considered to play a role in excess winter mortality include socioeconomic status<sup>17</sup>, influenza<sup>21, 22</sup>, age<sup>16</sup> and vitamin D deficiency. Vitamin D levels less than 20ng/ml is considered an independent additional risk factor for AMI<sup>23,24</sup> and is not just a reflection of poor health. Dietary sources of vitamin D are usually insufficient and deficiency occurs with inadequate sun exposure. Seasonality in Vitamin D levels have been observed and levels are usually lower around winter<sup>23,25</sup> creating an extra burden on the cardiovascular system by various postulated mechanisms leading to significant coronary artery disease<sup>26</sup> and poor collateral circulation<sup>27</sup>. This seasonality is attributed to variability in UVB exposure during the seasons<sup>28</sup>. There is the suggestion that correction of vitamin deficiency may reduce the cardiovascular risk.



1  
2  
3 There are few studies that have taken examined the phenomenon of excess winter mortality  
4 specifically due to AMI in England and Wales. Most studies treat the subject of excess winter  
5 mortality by assessing total mortality without isolating individual diagnosis. Assessing  
6 individual diseases might produce stronger evidence on the impact seasonal variation on a  
7 particular disease condition. Due to the overwhelming global impact of this condition, it is  
8 important to identify seasonal variation of mortality due to AMI and also points of possible  
9 preventive strategies that can help in reducing the incidence of the disease.  
10  
11  
12  
13

## 14 15 16 **Methodology**

17 This study was a secondary data analysis that assessed excess winter deaths due to AMI in  
18 England and Wales. The study used anonymised mortality data provided by the office of  
19 National Statistics (ONS), United Kingdom (UK) and mean monthly temperature data  
20 provided by the Meteorological Office, UK. The database provided by the ONS consisted of  
21 anonymised data of daily mortality in England and Wales for the period from 1997 to 2005.  
22 The International Classification of Disease (ICD) was used for coding the various cause of  
23 death. The ninth edition (ICD-9) was used from 1997 to 2000 while the tenth edition (ICD-  
24 10) was used between 2001 and 2005. The cause of death considered for the study was acute  
25 myocardial Infarction (ICD-9:410; ICD-10: I21). This was presented in 3 age groups: 0 to 64  
26 years, 65 to 74 years, and 75 years and above. There was no sex distribution provided.  
27  
28  
29  
30  
31  
32  
33

34  
35 Age-specific mortality rates were also calculated for each age group. The daily, monthly, and  
36 yearly mortality rates were calculated and the age specific population served as denominator.  
37 The population data for each year and each age group was extracted from ONS yearly  
38 publications. The monthly rates were standardised to 30 day months.  
39  
40  
41  
42

43 Adjustments in mortality rates were also made to account for changes in ICD coding. This  
44 was done using this formula:  $MA(y, d) = MO(y, d) \cdot R$ . MA is the adjusted daily mortality  
45 (deaths) for a day, d, in year, y. MO is the observed mortality. R is the comparability ratio:  
46 the ICD-10/ICD-9 comparability ratio for acute myocardial infarction 0.9889 was used to  
47 adjust ICD-9 code death counts<sup>29</sup>.  
48  
49  
50  
51  
52

53 Specifically the concept of excess winter deaths was explored in this study. The method used  
54 to analyse the excess winter deaths was first described by Curwen and it is similar to that  
55  
56  
57  
58  
59  
60

1  
2  
3 used by the ONS<sup>30</sup>. The months of December to March defines the winter period. The non-  
4 winter period is defined as the months of August to November before this winter period, and  
5 the months of April to July following the winter period.  
6  
7

8  
9 In order to quantify the seasonal variation in winter, the excess winter mortality (EWM),  
10 excess winter mortality ratio (EWMR), and the excess winter mortality index (EWMI) for  
11 each year was calculated. The EWM reflects the absolute difference in mortality between the  
12 winter season and non-winter season. Whereas the EWMR represents the relative risk of  
13 death during the winter months compared to the non-winter months. The EWMI represents a  
14 variant of relative risk reduction or “excess”. The EWMR and EWMI are viable tools for  
15 comparisons between age, sex, regions or countries. These estimates were also calculated for  
16 each age group. These estimates were calculated using the following formulae:  
17  
18  
19  
20  
21

- 22 •  $EWM = O - E$
  - 23 •  $EWMR = O/E$
  - 24 •  $EWMI = (O - E)/E$  or  $EWMR - 1$  (represented as a percentage)
- 25  
26  
27  
28

29 Where, O is the observed death count. This is the total death counts during the winter months,  
30 a period of 4 months, (winter deaths). E is the expected death count which is the total death  
31 counts during the non-winter months, a period of 8 months, divided by 2.  
32

33 Direct correlation between mean monthly temperature and monthly mortality rate was carried  
34 out with a significant level set at  $<0.05$ . Addition trend analysis with autoregressive  
35 integrated moving average (ARIMA) model and forecasting was done with a significant level  
36  $< 0.05$ .  
37  
38  
39  
40  
41

42 A regression model was used in assessing the rates of death during the winter season and  
43 non-winter seasons. The log-linear model was derived with the mortality count during winter  
44 period as the estimated outcome while age was the explanatory variable. The hypothesis was  
45 to test if there was any difference between excess winter mortality ratios amongst the various  
46 age groups. Therefore, the log of the average non-winter deaths was used as offset to fit the  
47 model. The model was fitted using a negative binomial model with a log link function due to  
48 over dispersion in the initial analysis. All analysis was carried out using the Statistical  
49 package for social sciences (SPSS) version 19. Significant p – value was defined as less than  
50 0.05.  
51  
52  
53  
54  
55  
56  
57  
58  
59  
60

## Results

**Table 1** Yearly mortality patterns of AMI from August 1997 to July 2005.

| Year Period* | Mortality Rate per 10,000 (Number of deaths) |                |                    |               |
|--------------|----------------------------------------------|----------------|--------------------|---------------|
|              | Age:                                         |                |                    |               |
|              | 0 to 64 years                                | 65 to 74 years | 75 years and above | Total         |
| 97/98        | 1.96 (8184)                                  | 24.72 (14299)  | 83.59 (33678)      | 10.87 (56161) |
| 98/99        | 1.81 (7581)                                  | 22.59 (13119)  | 79.84 (32283)      | 10.22 (52983) |
| 99/00        | 1.64 (6924)                                  | 20.11 (11724)  | 74.70 (30330)      | 9.41 (48978)  |
| 00/01        | 1.52 (6435)                                  | 17.99 (10528)  | 67.98 (27716)      | 8.55 (44679)  |
| 01/02        | 1.40 (5964)                                  | 16.28 (9567)   | 65.00 (26610)      | 8.03 (42141)  |
| 02/03        | 1.35 (5784)                                  | 14.71 (8685)   | 64.45 (26495)      | 7.77 (40964)  |
| 03/04        | 1.21 (5189)                                  | 13.39 (7937)   | 60.84 (25125)      | 7.22 (38251)  |
| 04/05        | 1.16 (5005)                                  | 11.84 (7066)   | 55.79 (23180)      | 6.62 (35251)  |
| <b>Total</b> | 1.51 (51066)                                 | 17.70 (82925)  | 69.02 (225417)     | 8.59 (359408) |

Between August 1997 and July 2005 there were 359,408 deaths due to acute myocardial infarction (AMI) with an average death count of 44,926 occurring yearly (Table 1). 62.7% of the total deaths were seen in the age group 75 years and above, 23.1% in age group 65 to 74 years and 14.2% in age group 0 to 64 years. A steady decline in the absolute death counts as well as mortality rates were seen in all age groups across the years (Figure 1). Overall, the decline in mortality rate for acute myocardial infarction was 6.8% yearly between August 1997 and July 2005.

A sharp rise in mortality is noticed in early November and peaks between December and January (Figure 2). A second rise also occurs around the month of March but the mortality rate seen during this period is not as high as that observed during the December and January months. The lowest mortality rates occurred during July and August months.

A plot of the mean temperatures in Celsius (figure 3) showed a trough during the months of December to March and when compared to figure 2 this indicates that lower temperatures are observed during the peaks of mortality during the year. A plot of the mean monthly temperature with mortality rate showed a significant negative correlation between the two variables ( $r = -0.48$ ;  $P < 0.0001$ ).

### Estimation of Excess Winter Mortality due to AMI

Excess winter mortality was seen in all the years observed. An average of about 2,463 excess winter deaths occurred yearly. In all year periods the highest absolute EWM occurred in those 75 years and above (Table 2). This age group also contribute an average of 70% to the excess winter deaths yearly. The excess winter mortality over the 8 year period resulted in 19,635 total deaths. This is equivalent to 5.5% of the overall yearly mortality due to AMI over the 8 year period.

The excess winter mortality ratio (winter: non-winter rate ratio) is greater than 1 in all year periods considered, indicating that there is greater mortality in winter compared to the non-winter months (Table 3). The excess winter mortality ratio describes the risk in dying during winter compared to non-winter months. This can also be represented as a percentage (Excess winter mortality index). This shows that there is an average 17% excess death yearly (Table 2).

**Table 2: Excess Winter Mortality and index secondary to AMI between 1997-2005**

| Year Period  | EWM (EWMI)            |                |              |              |
|--------------|-----------------------|----------------|--------------|--------------|
|              | Age:<br>0 to 64 years | 65 to 74 years | 75 years +   | Total        |
| <b>97/98</b> | 244.5(9%)             | 731.5(16%)     | 1716.0(16%)  | 2692.0(15%)  |
| <b>98/99</b> | 281.5(12%)            | 756.0(18%)     | 2280.0(23%)  | 3317.5(20%)  |
| <b>99/00</b> | 333.0(15%)            | 643.5(17%)     | 2715.0(29%)  | 3691.5(24%)  |
| <b>00/01</b> | 148.5(7%)             | 368.5(11%)     | 1332.5(15%)  | 1849.5(13%)  |
| <b>01/02</b> | 258.0(14%)            | 453.0(15%)     | 1372.5(16%)  | 2083.5(16%)  |
| <b>02/03</b> | 196.5(11%)            | 423.0(15%)     | 1430.0(17%)  | 2049.5(16%)  |
| <b>03/04</b> | 251.0(15%)            | 260.0(10%)     | 1339.5(17%)  | 1850.5(15%)  |
| <b>04/05</b> | 140.5(9%)             | 466.0(21%)     | 1494.5(21%)  | 2101.0(19%)  |
| <b>Total</b> | 1853.5(11%)           | 4101.5(16%)    | 13680.0(19%) | 19635.0(17%) |

**Table 3. Excess Winter Mortality Ratio secondary to AMI between 1997-2005**

| Year Period        | Excess winter mortality ratio (CI) |                   |                   |                   |
|--------------------|------------------------------------|-------------------|-------------------|-------------------|
|                    | Age:                               |                   |                   |                   |
|                    | 0 to 64 years                      | 65 to 74 years    | 75 years +        | Total             |
| 97/98              | 1.09 (1.07, 1.11)                  | 1.16 (1.15, 1.18) | 1.16 (1.15, 1.17) | 1.15 (1.14, 1.16) |
| 98/99              | 1.12 (1.09, 1.14)                  | 1.18 (1.17, 1.20) | 1.23 (1.22, 1.24) | 1.20 (1.19, 1.21) |
| 99/00              | 1.15 (1.13, 1.17)                  | 1.17 (1.16, 1.19) | 1.29 (1.28, 1.31) | 1.24 (1.24, 1.25) |
| 00/01              | 1.07 (1.05, 1.09)                  | 1.11 (1.09, 1.13) | 1.15 (1.14, 1.16) | 1.13 (1.12, 1.14) |
| 01/02              | 1.14 (1.11, 1.16)                  | 1.15 (1.13, 1.17) | 1.16 (1.15, 1.17) | 1.16 (1.15, 1.17) |
| 02/03              | 1.11 (1.08, 1.13)                  | 1.15 (1.13, 1.17) | 1.17 (1.16, 1.18) | 1.16 (1.15, 1.17) |
| 03/04              | 1.15 (1.13, 1.18)                  | 1.10 (1.08, 1.12) | 1.17 (1.16, 1.18) | 1.15 (1.14, 1.16) |
| 04/05              | 1.09 (1.06, 1.11)                  | 1.21 (1.19, 1.23) | 1.21 (1.19, 1.22) | 1.19 (1.18, 1.20) |
| <b>All periods</b> | 1.11 (1.10, 1.13)                  | 1.16 (1.14, 1.17) | 1.19 (1.18, 1.20) | 1.17 (1.17, 1.18) |

A regression analysis was carried using a negative binomial regression to estimate the excess winter mortality ratio and age (Table 4). The relative risk of excess mortality in age groups 65 to 74 years and 75 years and above was 1.36 and 2.45 respectively compared to the younger age group.

**Table 4: Excess winter mortality ratio and age**

| Age            | coefficient | EWM(%) | Relative risk    | P-value |
|----------------|-------------|--------|------------------|---------|
| 0 to 64 years  | reference   | 11     |                  |         |
| 65 to 74 years | 0.31        | 16     | 1.36 (1.18-1.57) | <0.0001 |
| 75 years +     | 0.89        | 19     | 2.45 (2.16-2.77) | <0.0001 |

Figure 4 shows the trend of mortality rate and excess winter mortality index (EWMI) secondary to AMI. There is a steady decline in mortality rate with a significant trend for reduction in AMI associated mortality observed over the period studied ( $p < 0.001$ ). The forecast for the next 11 year periods shows a continued decline. The forecast for the EWMI shows no change and remains relatively the same ( $p < 0.001$ ).

## Discussion

The results from the data analysis showed there is a significant increase in mortality rates due to AMI during the winter period in England and Wales. In this study, the excess winter mortality ratio over the 8 year study period for all age groups was 1.17 with a resultant 17% excess winter deaths for acute myocardial infarction. This amounted to about 20,000 excess deaths due to this disease. From their analysis of 2266 deaths, Biedrzycki and Baithun<sup>1</sup> in their study of mortality from myocardial infarction found that December was the peak month of mortality. A decline was observed from February onwards with the lowest mortality rate observed during the month of August. This pattern is similar to what was elicited in this paper: the highest mortality rates peaked between December and January and lowest mortality rates were observed during the months of July and August.

Besides the demonstrable winter excess, the monthly mortality rate plot showed a double peak. A peak in mortality, which was clearly above the mean mortality rate, was observed around the month of March. This second peak in mortality was less than that seen in the months of December and January.

Since fluctuations in daily temperatures could not be appreciated from monthly mean temperature data, it is possible that absolute low outdoor temperatures may not be the only factor in causing mortality but rather daily changes in temperature may also be significant. It has already been established that in most countries in Europe a 1°C drop in temperature is associated in increasing in mortality<sup>12, 13</sup>. Carson et al, in their study found that cardiovascular diseases were more sensitive to temperature changes than respiratory disease<sup>31</sup>. This relationship has also been recognized in other studies: Kysely et al<sup>14</sup> found that fluctuations in daily temperatures resulted in increase in mortality rates of cardiovascular diseases. They also noted that a second cold spell usually had a lower excess mortality and suggested that the reason for this might be that some form of acclimatization to the previous cold spell might be protective against the next. This might explain the double peaks that were observed in this study. Large variations in temperatures between winter and non-winter months as seen in countries with warm winters such as England and Wales may also explain the winter paradox observed in Europe. It is possible that the lack of acclimatization due to the non-persistent cold weather, unlike in Iceland and Russia, may lead to a greater impact when the winter

1  
2  
3 season does arrive. However, this is not conclusive and would require more research to  
4 clearly define such an association.  
5  
6

7  
8 The study has shown that AMI has undergone a steady decline in England and Wales over the  
9 years. This is remarkable. The decline of mortality rate from 10.87 deaths per 100,000  
10 population to 6.62 deaths per 10,000 population was observed over the 8 years study period.  
11 This was statistically significant. The reasons for this may include such factors as better  
12 diagnostic and therapeutic procedures, healthier life styles of the population, and better  
13 awareness of the public. Despite this steady decrease in total yearly mortality rate, the risk of  
14 dying from AMI during winter has remained the same. This is suggestive that excess winter  
15 mortality is not a function of the overall mortality. This has important control and prevention  
16 implications: the measures used to control overall mortality may not necessary influence  
17 winter excess.  
18  
19  
20  
21  
22  
23

24  
25 One of such measures could be vitamin D supplementation. There are several factors which  
26 could be possibly associated with excess winter mortality and this may include seasonal  
27 variations in solar ultraviolet-B (UVB) doses and serum 25-hydroxyvitamin D [25(OH)D]  
28 concentrations, temperature and humidity<sup>28</sup>. Amongst these factors, possibly 25(OH)D  
29 concentration (<20 ng/ml) would be modifiable risk factor and its supplementation to levels  
30 greater than 36 ng/mL might reduce death rates significantly in winter months. In a Study in  
31 Iran<sup>32</sup>, supplementation of vitamin to levels greater than 20ng/mL was effective in reducing  
32 the cholesterol level by about 16mg/dl. The clinical significance of this result needs to be  
33 investigated. Several clinical trials as well as observational and ecological studies are on-  
34 going and these will provide results to clarify whether vitamin D deficiency is a modifiable  
35 factor to prevent cardiovascular disease.  
36  
37  
38  
39  
40  
41  
42  
43

44  
45 There was a gradient relationship between excess winter deaths and age: we found increasing  
46 winter deaths with increasing age. A regression model was used to estimate the relationship  
47 between age and winter mortality and we found a more than a two-fold increase in risk when  
48 the oldest age group was compared to the youngest. The older age groups seem to be more  
49 vulnerable to the effects of winter and should be an important risk targeted group for  
50 prevention policies and strategies.  
51  
52  
53  
54  
55  
56  
57  
58  
59  
60



1  
2  
3 The excess winter paradox observed across countries in Europe and the identified decline in  
4 winter deaths seen in some countries suggests that significant increases in death during winter  
5 are preventable. The decline observed in excess winter mortality in all age groups, as well as  
6 overall, observed during the 2000-2001 year is interesting. This period had the lowest  
7 EWMR and also observed the highest percentage drop in EWMR. It also had the least  
8 absolute excess winter death counts among all the year periods studied. A few months  
9 earlier, the UK government introduced innovative measures to tackle the burden of winter  
10 excess deaths. These measures were robust interventions incorporated in the fuel poverty  
11 strategy. This sharp drop in EWMR may suggest that these measures may have had an  
12 immediate impact. However, this study cannot conclusively confirm this. Nevertheless, if  
13 these strategies had had an immediate impact, it was definitely short-lived. This is because  
14 despite the fluctuations the trend has remained the same. In other words, the increased risk of  
15 dying during winter due to AMI has remained high in England and Wales despite the various  
16 strategies implemented by the government, and the trend analysis shows that it will remain so  
17 for a couple of years. It might be that it is too soon to evaluate the impact of these measures  
18 or they may not be effective.  
19  
20  
21  
22  
23  
24  
25  
26  
27  
28  
29

### 30 **Conclusion**

31 This study has shown that increased winter mortality due to acute myocardial infarction does  
32 exist. The excess winter mortality has remained high for AMI for England and Wales over  
33 the years. The study also identified an association between increasing age and increasing  
34 excess winter mortality. There is a possibility that acclimatization may play a role in the  
35 mechanisms that initiate winter deaths.  
36  
37  
38  
39  
40  
41

### 42 **Figure Legends**

43 **Figure 1:** Showing a decline in mortality rate due to AMI over the year periods  
44  
45

46 **Figure 2** Showing variation in mortality rate over the months over the year periods  
47  
48

49 **Figure 3:** A plot of the mean monthly temperatures in Celsius with an obvious deep in  
50 temperatures during the months of December to March  
51  
52

53  
54 **Figure 4:** Trend in mortality rate and excess winter mortality index over the year period  
55 observed and forecast for the next 11 years. There is a steady decline in mortality rate with a  
56  
57  
58  
59  
60



1  
2  
3 significant trend for reduction in AMI associated mortality. The forecast for the next 11 year  
4 periods shows a continued decline. The forecast for the EWMI shows no change.  
5  
6

#### 7 **A. Contributor ship Statement**

8 **Find below the contribution of each author**

- 9  
10  
11
- 12 • **Osakpolor Ogbemor:** literature review, data analysis and interpretation of  
13 data. Drafting the manuscript, revising manuscript. Approval of the version of  
14 the manuscript to be published
  - 15 • **Odugbemi Babatunde:** literature review, drafting the manuscript, revising  
16 manuscript. Approval of the version of the manuscript to be published
  - 17 • **Maheswaran Ravi.:** Conception and design of study, acquisition of data,  
18 literature review, revising manuscript. Approval of the version of the  
19 manuscript to be published.
  - 20 • **Patel Kavya:** drafting the manuscript, revising manuscript. Approval of the  
21 version of the manuscript to be published.  
22  
23  
24  
25  
26  
27  
28

29  
30 **B. Competing interest:** None

31  
32  
33 **C. Funding:** Self-funded by the authors

34  
35  
36 **D. Data sharing statement:** The data used in this study was obtained from the office of  
37 national statistics, United Kingdom.  
38  
39  
40  
41  
42  
43  
44  
45  
46  
47  
48  
49  
50  
51  
52  
53  
54  
55  
56  
57  
58  
59  
60

## References

1. Biedrzycki, Baithun S. Seasonal variation in mortality from myocardial infarction and haemopericardium. A post-mortem study. *J Clin Pathol*. 2006; 59: 64-66.
2. Sheth T, Nair C, Muller J, Yusuf S. Increased winter mortality from acute myocardial infarction and stroke: the effect of age. *JACC*. 1999; 33(7):1916–9.
3. Spencer F, Goldberg RJ, Becker RC, Gore MJ. Seasonal distribution of acute myocardial infarction in the second national registry of myocardial infarction. *JACC*. 1998; 31(6):1226–33.
4. Curwen M. Excess winter mortality: a British phenomenon? *Health Trends 1990/91*; 22:169-75. In: Aylin P, Morris S, Wakefield J, Grossinho A, Jarup L, Elliot P. Temperature, housing, deprivation and their relationship to excess winter mortality in Great Britain, 1986-1996. *Int J Epid*. 2001; 30: 1100-1108.
5. Healy JD. Excess winter mortality in Europe: a cross country analysis identifying key risk factors. *J Epidemiol Community Health* 2003; 57:784–9.
6. Rumana N, Kita Y, Turin TC et al. Seasonal pattern of incidence and case fatality of acute myocardial infarction in a Japanese population (from the Takashima AMI Registry, 1988 to 2003). *Am J Cardiol*. 2008; 102(10):1307-1311.
7. Sharovsky R, César L. Increase in mortality due to myocardial infarction in the Brazilian City of São Paulo during winter. *Arq Bras Cardiol*. 2002; 78(1): 106-109.
8. Davie GS, G Baker MG, Hales S, Carlin JB. Trends and determinants of excess winter mortality in New Zealand: 1980 to 2000. *BMC Public Health*. 2007; 7:263-272.
9. Curriero FC, Heiner KS, Samet JM, Zeger SL, Strug L, Patz JA. Temperature and mortality in 11 cities of the eastern United States. *Am J Epidemiol* 2002; 155:80-87.
10. Aylin P, Morris S, Wakefield J, Grossinho A, Jarup L, Elliot P. Temperature, housing, deprivation and their relationship to excess winter mortality in Great Britain, 1986-1996. *Int J Epid*. 2001; 30: 1100-1108.
11. Eurowinter Group. Cold exposure and winter mortality from ischaemic heart disease, cerebrovascular disease, respiratory disease, and all causes, in warm and cold regions of Europe. *Lancet*. 1997; 349:1341–1346.
12. Gemmell I, McLoone P, Boddy FA, et al. Seasonal variation in mortality in Scotland. *Int J Epidemiol* 2000; 29:274–9

13. Bhaskaran K, Hajat S, Haines A, Herrett E, Wilkinson P, Smeeth L. Short term effects of temperature on risk of myocardial infarction in England and Wales: time series regression analysis of the Myocardial Ischaemia National Audit Project (MINAP) registry. *BMJ*. 2010; 341:c3720.
14. Kysely J, Pokorna L, Kyncl J, Kriz B. Excess cardiovascular mortality associated with cold spells in the Czech Republic. *BMC Public Health*. 2009; 9:19.
15. Kunst AE, Looman CW, Mackenbach JP. Outdoor air temperature and mortality in The Netherlands: a time-series analysis. *Am J Epidemiol*. 1993; 137(3):331-41.
16. Laake K, Sverre JM. Winter Excess Mortality: A Comparison between Norway and England plus Wales. *Age and Ageing*. 1996; 25:343-348.
17. McKee CM. Deaths in winter: can Britain learn from Europe? *Eur J Epidemiol*. 1989 Jun; 5(2):178-82.
18. Clinch JP, Healy JD. Housing standards and excess winter mortality. *J Epidemiol Community Health* 2000; 54:719–20.
19. Fuel Poverty Team. UK fuel poverty strategy: November 2001 - Ministerial Foreword. [Accessed 5 Aug 2010]. Available from: [www.berr.gov.uk/files/file16495.pdf](http://www.berr.gov.uk/files/file16495.pdf).
20. Donaldson GC, Tchernjavskii VE, Ermakov SP, Bucher K, Keatinge WR. Winter mortality and cold stress in Yekaterinburg, Russia: interview survey. *BMJ*. 1998; 316(7130):514-8.
21. Madjid M, Naghavi M, Litovsky S, Casscells SW. Influenza and cardiovascular disease: a new opportunity for prevention and the need for further studies. *Circulation*. 2003; 108(22):2730-2736.
22. Donaldson GC, Keatinge WR. Excess winter mortality: influenza or cold stress? Observational study. *BMJ*. 2002; 324(7329):89-90.
23. Tokarz A, Beata Kuśnierz-Cabała B, Kuźniewski M. Seasonal effect of vitamin D deficiency in patients with acute myocardial infarction. *Kardiol Pol* 2016; 74, 8: 786–792.
24. Welles CC, Whooley MA, Karumanchi SA, et al. Vitamin D deficiency and cardiovascular events in patients with coronary heart disease: data from the Heart and Soul Study, *Am J Epidemiology*, 2014, vol. 179 11(pg. 1279-1287)
25. Aleksova A, Belfiore R, Carriere C, Kassem S, La Carrubba S, Barbati G, Sinagra G. Vitamin D Deficiency in Patients with Acute Myocardial Infarction: An Italian Single-Center Study. *Int J Vitam Nutr Res*. 2015;85 (1-2):23-30.

- 1
- 2
- 3 26. Verdoia M, Schaffer A, Sartori C et al. Vitamin D deficiency is independently
- 4 associated with the extent of coronary artery disease. *Eur J Clin Invest*, 2014; 44:
- 5 634–642
- 6
- 7 27. Sahin I, Okuyan E, Gungor B et al. Lower vitamin D level is associated with poor
- 8 coronary collateral circulation. *Scand Cardiovasc J*, 2014; 48: 278–283. doi:
- 9 10.3109/14017431.2014.940062.
- 10
- 11 28. Grant WB, Bhottoa HP, Boucher BJ. Seasonal variations of U.S. mortality rates:
- 12 Roles of solar ultraviolet-B doses, vitamin D, gene expression, and infections. *J*
- 13 *Steroid Biochem Mol Biol*. 2017 Oct;173:5-12.
- 14
- 15 29. Anderson RN, M. Miniño AM, Hoyert DL, Rosenberg HM. Comparability of cause
- 16 of death between ICD–9 and ICD–10: preliminary estimates. *Natl Vital Stat*. 2001; 49
- 17 (2): 1-32.
- 18
- 19 30. Johnson H, Griffiths C. Estimating excess winter mortality in England and Wales.
- 20 *Health Statistics Quarterly*. 2003; 20: 19–24.
- 21
- 22 31. Carson C, Hajat S, Armstrong B, Wilkinson P. Declining Vulnerability to
- 23 Temperature-related Mortality in London over the 20th Century. *Am J Epidemiol*
- 24 2006; 164:77–84.
- 25
- 26 32. Rahimi-Ardabili H, Pourghassem Gargari B, Farzadi L. Effects of vitamin D on
- 27 cardiovascular disease risk factors in polycystic ovary syndrome women with vitamin
- 28 D deficiency, *J Endocrinol Invest* , 2013, vol. 36 1(pg. 28-32)
- 29
- 30
- 31
- 32
- 33
- 34
- 35
- 36
- 37
- 38
- 39
- 40
- 41
- 42
- 43
- 44
- 45
- 46
- 47
- 48
- 49
- 50
- 51
- 52
- 53
- 54
- 55
- 56
- 57
- 58
- 59
- 60

1  
2  
3  
4  
5  
6  
7  
8  
9  
10  
11  
12  
13  
14  
15  
16  
17  
18  
19  
20  
21  
22  
23  
24  
25  
26  
27  
28  
29  
30  
31  
32  
33  
34  
35  
36  
37  
38  
39  
40  
41  
42  
43  
44  
45  
46  
47  
48  
49  
50  
51  
52  
53  
54  
55  
56  
57  
58  
59  
60

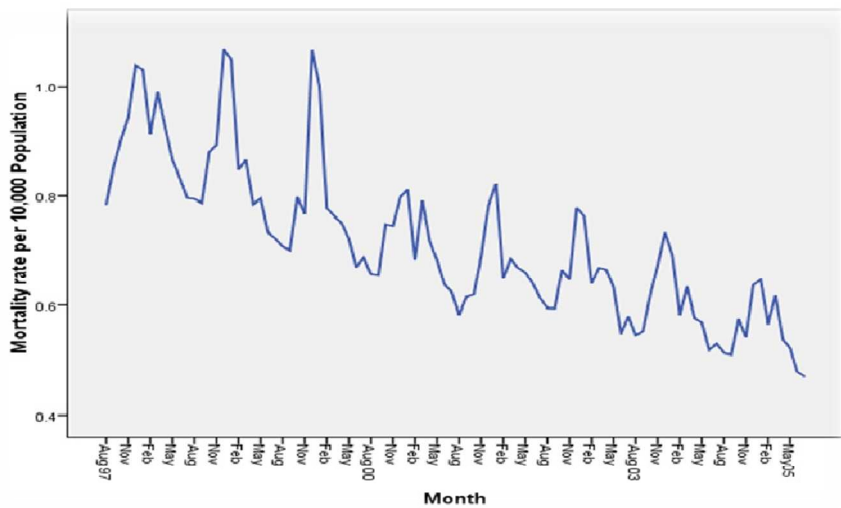

Figure 1: Showing a decline in mortality rate due to AMI over the year periods

203x114mm (144 x 144 DPI)

review only

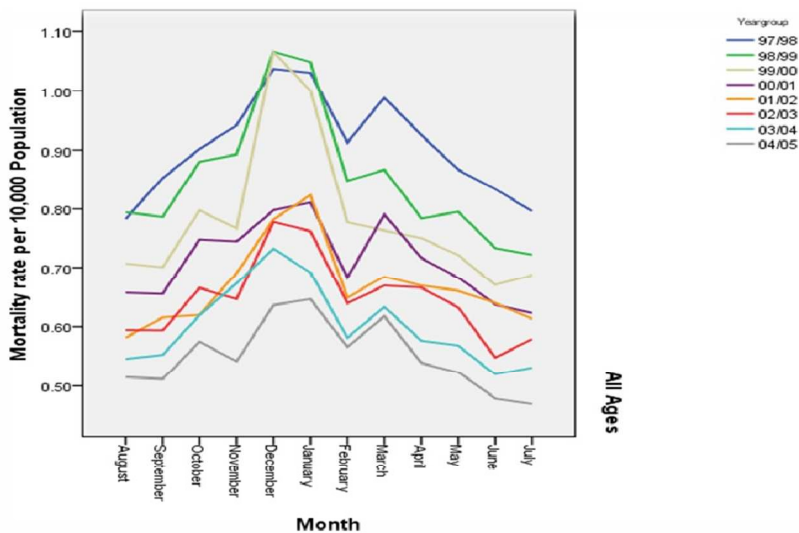

Figure 2: showing variation in mortality rate over the months over the year periods

203x114mm (144 x 144 DPI)

review only

1  
2  
3  
4  
5  
6  
7  
8  
9  
10  
11  
12  
13  
14  
15  
16  
17  
18  
19  
20  
21  
22  
23  
24  
25  
26  
27  
28  
29  
30  
31  
32  
33  
34  
35  
36  
37  
38  
39  
40  
41  
42  
43  
44  
45  
46  
47  
48  
49  
50  
51  
52  
53  
54  
55  
56  
57  
58  
59  
60

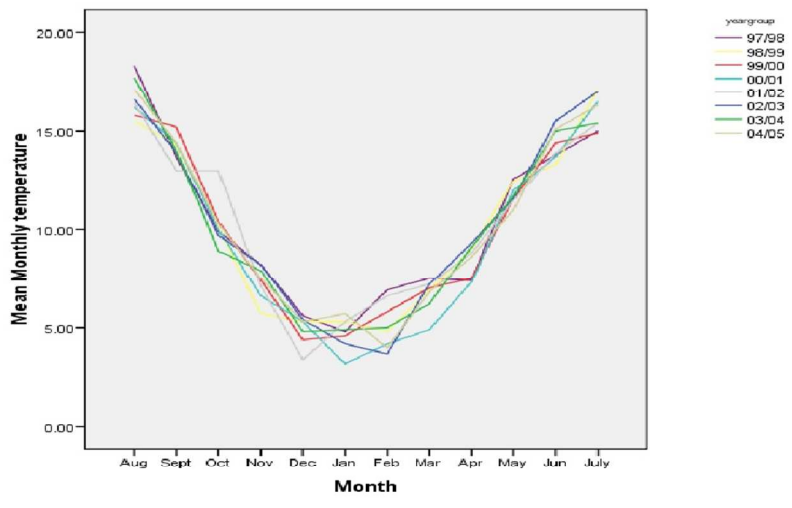

Figure 3: A plot of the mean monthly temperatures in Celsius with an obvious dip in temperatures during the months of December to March

203x114mm (144 x 144 DPI)

Review only

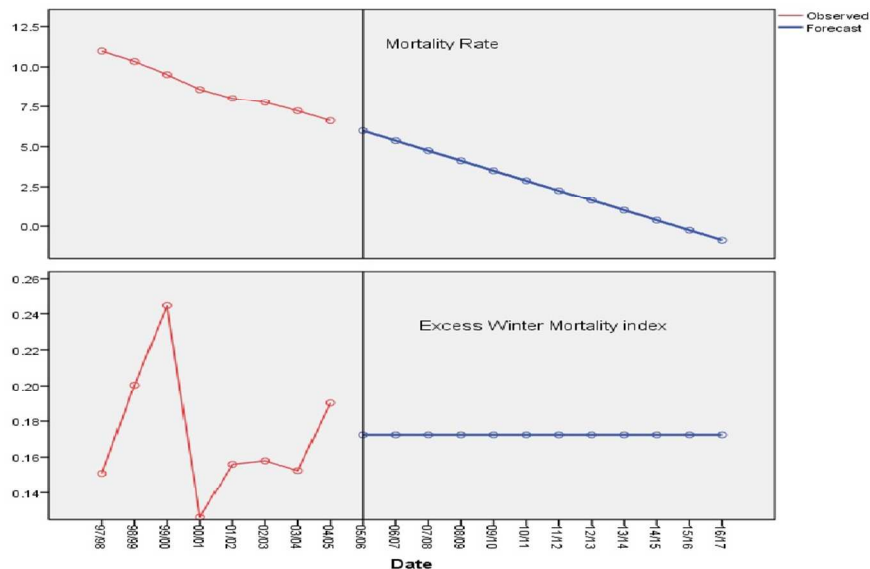

Figure 4: Trend in mortality rate and excess winter mortality index over the year period observed and forecast for the next 11 years. There is a steady decline in mortality rate with a significant trend for reduction in AMI associated mortality. The forecast for the next 11 year periods shows a continued decline. The forecast for the EWMI shows no change.

203x118mm (144 x 144 DPI)

view only



# BMJ Open

## Seasonal variation in mortality secondary to acute myocardial infarction in England and Wales: a secondary data analysis

|                                 |                                                                                                                                                                                                                                                                                                          |
|---------------------------------|----------------------------------------------------------------------------------------------------------------------------------------------------------------------------------------------------------------------------------------------------------------------------------------------------------|
| Journal:                        | <i>BMJ Open</i>                                                                                                                                                                                                                                                                                          |
| Manuscript ID                   | bmjopen-2017-019242.R3                                                                                                                                                                                                                                                                                   |
| Article Type:                   | Research                                                                                                                                                                                                                                                                                                 |
| Date Submitted by the Author:   | 09-Mar-2018                                                                                                                                                                                                                                                                                              |
| Complete List of Authors:       | Ogbebor, Osakpolor; Saint Peters University Hospital, Internal Medicine Odugbemi , Babatunde; Lagos State University Teaching Hospital (LASUTH)<br>Maheswaran, Ravi; University of Sheffield, School of Health and Related Research<br>Patel, Kavya; Saint Peters University Hospital, Internal Medicine |
| <b>Primary Subject Heading</b>: | Public health                                                                                                                                                                                                                                                                                            |
| Secondary Subject Heading:      | Cardiovascular medicine, Nutrition and metabolism, Health policy, Public health                                                                                                                                                                                                                          |
| Keywords:                       | Winter mortality, Seasonal Variation, Myocardial infarction < CARDIOLOGY, Fuel poverty, Outdoor Temperature                                                                                                                                                                                              |
|                                 |                                                                                                                                                                                                                                                                                                          |

SCHOLARONE™  
Manuscripts

Only

## Seasonal variation in mortality secondary to acute myocardial infarction in England and Wales: a secondary data analysis

Ogbebor Osakpolor, Saint Peter's University Hospital, USA.  
(osakpolor.ogbebor@yahoo.com)

Odugbemi Babatunde, Lagos State University Teaching Hospital, Lagos, Nigeria.  
([batatunde.odugbemi@yahoo.com](mailto:batatunde.odugbemi@yahoo.com))

Maheswaran Ravi, University of Sheffield, Sheffield., UK. ([r.maheswaran@sheffield.ac.uk](mailto:r.maheswaran@sheffield.ac.uk))

Patel Kavya, Saint Peter's University Hospital, USA. ([kavya\\_patel2007@yahoo.co.in](mailto:kavya_patel2007@yahoo.co.in))  
(Corresponding Author)

### Abstract

**Background:** Acute myocardial infarction (AMI) is a leading cause of death globally. Increase in AMI mortality during winter has also been identified in existing literature. This has been associated with low outdoor and indoor temperatures and increasing age. The relationship between AMI and other factors such as gender and socioeconomic factors varies from study to study. Influenza epidemics have also been identified as a contributory factor.

**Objective:** This paper aims to illustrate the seasonal trend in mortality due to AMI in England and Wales with emphasis on excess winter mortality.

**Methods:** Monthly mortality rates per 10,000 population were calculated from data provided by the U.K. Office for National Statistics (ONS) for 1997 to 2005. To quantify the seasonal variation in winter, the excess winter mortality estimates (Excess Winter Mortality (EWM), Excess Winter Mortality Ratio (EWMR), Excess Winter Mortality Index (EWMI) for each year were calculated. Negative binomial regression model was used to estimate the relationship between increasing age and excess winter mortality.

### Results:

The decline in mortality rate for acute myocardial infarction was 6.8% yearly between August 1997 and July 2005. Significant trend for reduction in AMI associated mortality was observed over the period ( $p < 0.001$ ). This decline was not seen with excess winter mortality ( $p < 0.001$ ). 17% excess deaths were observed during winter. This amounted to about 20,000 deaths over the 8 year period. Increasing winter mortality was seen with increasing age for AMI.

1  
2  
3 **Conclusion:** Excess winter mortality secondary to AMI does occur in England and Wales.  
4 Excess winter deaths due to AMI have remained high despite decline in overall mortality.  
5 More research is needed to identify the relationship of sex, temperature, acclimatization,  
6 vitamin D and excess winter deaths due to AMI.  
7  
8  
9

### 10 11 **Strengths**

- 12 • The data used involved a large sample size and this was able to capture relevant results  
13 in the data analysis and this data represents the population of interest.
- 14 • The paper uses statistical methods that have been verified to analyse trends in mortality  
15 as well as to define the concept of excess winter mortality. The data analysis was  
16 thorough, standardising the outcomes and presenting the data in a way that can be  
17 comparable with various populations.  
18  
19  
20  
21  
22  
23

### 24 **Limitations**

- 25 • Although the data provided by the ONS was complete and considered accurate, the data  
26 characteristics however restricted the number of variables that could be controlled such  
27 as sex distribution. To reach a more robust conclusion it would have been necessary to  
28 have data to test for effects of housing, indoor temperatures, outdoor temperatures,  
29 influenza epidemics as well as other possible confounders.
- 30 • The population data which was used as denominator would reduce in accuracy as the  
31 year of study moved away from the recent census (29<sup>th</sup> April 2001). This is because the  
32 midyear populations after this date were extrapolated using birth and death data; these  
33 data are prone to their own type of error. However, it is anticipated that the brief period  
34 used in the research was unlikely to experience any dramatic changes in population.  
35  
36  
37  
38  
39  
40  
41  
42  
43  
44  
45  
46  
47  
48  
49  
50  
51  
52  
53  
54  
55  
56  
57  
58  
59  
60

## Background

Studies over time have observed an increase in mortality rate during winter months<sup>1-3</sup>. This appears to be a global phenomenon with evidence of excess winter mortality occurring in a number of countries, including the United Kingdom<sup>4,5</sup>, Japan<sup>6</sup>, Brazil<sup>7</sup>, Canada<sup>2</sup>, the United States<sup>3</sup> and New Zealand<sup>8</sup>.

The relationship between mortality and temperature observes a U shape<sup>9</sup>: an increase in mortality is seen with extremes in temperature. Excess winter mortality which is defined as “a significant increase in the number of deaths during winter compared with the average of the non-winter seasons” has been linked to the drop in temperature<sup>10</sup>. Low temperatures have been implicated in the increase in number of deaths during the winter months; however, they are not due to hypothermia. There is evidence to suggest that low temperatures trigger pathological mechanisms that lead to increase in blood pressure and thrombus formation<sup>2</sup>. The consequence of this is the initiation of physiological stress that results in the development of a myocardial infarction or a stroke. A study involving data from various countries in Europe found a similar association but also identified 18°C as the threshold for this to occur<sup>11</sup>. Research carried out in Scotland<sup>12</sup> and in England<sup>13</sup> could quantify this relationship: a 1°C drop in temperature resulted in a 1-2% increase in the number of deaths. This corresponds to increased odds of dying during the winter by 1.5%<sup>10</sup>.

The effects of temperature are both direct and immediate. Time series analyses have shown that there is a minimum lag time of about 24 hours between drop in temperature and increase in mortality<sup>14</sup>. The impact of cold temperature could also extend over a period of 1 to 2 weeks. This lag time shows that there is a possible mechanism that is initiated by the low outdoor temperatures directly that leads to death supporting evidence from previous studies. It has also been shown that the effect of temperature is significantly potentiated by high relative humidity and strong winds<sup>15</sup>.

There are suggestions that the influence of winters and low temperatures on the increase in mortality rates is preventable. This is because there is ecological evidence that countries with colder winters do not have greater excess winter mortality when compared to countries with milder winters<sup>4</sup>, for example the United Kingdom when compared to Scandinavian countries<sup>16,17</sup>. This observation is referred to as the excess winter paradox.

1  
2  
3  
4 Housing insulation and the concept of fuel poverty, both of which affect the indoor  
5 temperature, are some of the factors thought to be responsible for the paradox. Housing in  
6 Britain has lower insulation properties compared to houses in Germany, Russia or the  
7 Scandinavian countries<sup>18</sup>. Due to the low insulation properties of housing in England and  
8 Wales, it is more expensive to warm these homes when compared to houses in other  
9 European states. This introduces the concept of fuel poverty. Fuel poverty is defined as a  
10 situation “*when in order to heat its home to an adequate standard of warmth a household*  
11 *needs to spend more than 10% of its income on total fuel use*<sup>19</sup>.” The World Health  
12 Organization’s (WHO) recommendation of adequate standard warmth is defined as 18°C in  
13 occupied rooms and 21°C in living room. The temperature level of 18°C is remarkable  
14 because below this threshold has been identified as when significant mortality occurs. The  
15 ability to generate heat to a surrounding temperature above this identified threshold might  
16 prove necessary. A behavioural component may also be contributory to the paradox. For  
17 example people living in warmer winters such as United Kingdom and Portugal were less  
18 likely to heat the living and bedroom to recommended levels when outdoor temperature  
19 drops<sup>11</sup>. This is a marked contrast to persons living in countries like Russia<sup>20</sup> who  
20 maintained their indoor temperatures at 20.9°C and 24.2°C when the temperature outside was  
21 7°C. Studies also show that people in the United Kingdom were also less likely to wear  
22 protective clothing such as hats, heavy jackets and gloves<sup>11</sup>. The UK Government has  
23 acknowledged that excess winter mortality is a problem and currently has put in place  
24 policies to tackle this phenomenon.  
25  
26  
27  
28  
29  
30  
31  
32  
33  
34  
35  
36  
37  
38  
39

40 Other factors that are considered to play a role in excess winter mortality include  
41 socioeconomic status<sup>17</sup>, influenza<sup>21, 22</sup>, age<sup>16</sup> and vitamin D deficiency. 25-hydroxyvitamin D  
42 [25(OH)D] levels less than 20ng/ml is considered an independent additional risk factor for  
43 AMI<sup>23,24</sup> and is not just a reflection of poor health. Dietary sources of vitamin D are usually  
44 insufficient and deficiency occurs with inadequate sun exposure. Seasonality in 25(OH)D  
45 levels have been observed and levels are usually lower around winter<sup>23,25</sup> creating an extra  
46 burden on the cardiovascular system by various postulated mechanisms leading to significant  
47 coronary artery disease<sup>26</sup> and poor collateral circulation<sup>27</sup>. This seasonality is attributed to  
48 variability in UVB exposure during the seasons<sup>28</sup>. There is the suggestion that correction of  
49 vitamin D deficiency may reduce the cardiovascular risk.  
50  
51  
52  
53  
54  
55  
56  
57  
58  
59  
60

1  
2  
3 There are few studies that have taken examined the phenomenon of excess winter mortality  
4 specifically due to AMI in England and Wales. Most studies treat the subject of excess winter  
5 mortality by assessing total mortality without isolating individual diagnosis. Assessing  
6 individual diseases might produce stronger evidence on the impact seasonal variation on a  
7 particular disease condition. Due to the overwhelming global impact of this condition, it is  
8 important to identify seasonal variation of mortality due to AMI and also points of possible  
9 preventive strategies that can help in reducing the incidence of the disease.  
10  
11  
12  
13  
14

## 15 **Methodology**

16  
17 This study was a secondary data analysis that assessed excess winter deaths due to AMI in  
18 England and Wales. The study used anonymised mortality data provided by the office of  
19 National Statistics (ONS), United Kingdom (UK) and mean monthly temperature data  
20 provided by the Meteorological Office, UK. The database provided by the ONS consisted of  
21 anonymised data of daily mortality in England and Wales for the period from 1997 to 2005.  
22 The International Classification of Disease (ICD) was used for coding the various cause of  
23 death. The ninth edition (ICD-9) was used from 1997 to 2000 while the tenth edition (ICD-  
24 10) was used between 2001 and 2005. The cause of death considered for the study was acute  
25 myocardial Infarction (ICD-9:410; ICD-10: I21). This was presented in 3 age groups: 0 to 64  
26 years, 65 to 74 years, and 75 years and above. There was no sex distribution provided.  
27  
28  
29  
30  
31  
32  
33  
34

35 Age-specific mortality rates were also calculated for each age group. The daily, monthly, and  
36 yearly mortality rates were calculated and the age specific population served as denominator.  
37 The population data for each year and each age group was extracted from ONS yearly  
38 publications. The monthly rates were standardised to 30 day months.  
39  
40  
41  
42

43 Adjustments in mortality rates were also made to account for changes in ICD coding. This  
44 was done using this formula:  $MA(y, d) = MO(y, d) \cdot R$ . MA is the adjusted daily mortality  
45 (deaths) for a day, d, in year, y. MO is the observed mortality. R is the comparability ratio:  
46 the ICD-10/ICD-9 comparability ratio for acute myocardial infarction 0.9889 was used to  
47 adjust ICD-9 code death counts<sup>29</sup>.  
48  
49  
50  
51  
52

53 Specifically the concept of excess winter deaths was explored in this study. The method used  
54 to analyse the excess winter deaths was first described by Curwen and it is similar to that  
55  
56  
57  
58  
59  
60

1  
2  
3 used by the ONS<sup>30</sup>. The months of December to March defines the winter period. The non-  
4 winter period is defined as the months of August to November before this winter period, and  
5 the months of April to July following the winter period.  
6  
7

8  
9 In order to quantify the seasonal variation in winter, the excess winter mortality (EWM),  
10 excess winter mortality ratio (EWMR), and the excess winter mortality index (EWMI) for  
11 each year was calculated. The EWM reflects the absolute difference in mortality between the  
12 winter season and non-winter season. Whereas the EWMR represents the relative risk of  
13 death during the winter months compared to the non-winter months. The EWMI represents a  
14 variant of relative risk reduction or “excess”. The EWMR and EWMI are viable tools for  
15 comparisons between age, sex, regions or countries. These estimates were also calculated for  
16 each age group. These estimates were calculated using the following formulae:  
17  
18  
19  
20  
21

- 22 •  $EWM = O - E$
  - 23 •  $EWMR = O/E$
  - 24 •  $EWMI = (O - E)/E$  or  $EWMR - 1$  (represented as a percentage)
- 25  
26  
27  
28

29 Where, O is the observed death count. This is the total death counts during the winter months,  
30 a period of 4 months, (winter deaths). E is the expected death count which is the total death  
31 counts during the non-winter months, a period of 8 months, divided by 2.  
32

33 Direct correlation between mean monthly temperature and monthly mortality rate was carried  
34 out with a significant level set at  $<0.05$ . Addition trend analysis with autoregressive  
35 integrated moving average (ARIMA) model and forecasting was done with a significant level  
36  $< 0.05$ .  
37  
38  
39  
40  
41

42 A regression model was used in assessing the rates of death during the winter season and  
43 non-winter seasons. The log-linear model was derived with the mortality count during winter  
44 period as the estimated outcome while age was the explanatory variable. The hypothesis was  
45 to test if there was any difference between excess winter mortality ratios amongst the various  
46 age groups. Therefore, the log of the average non-winter deaths was used as offset to fit the  
47 model. The model was fitted using a negative binomial model with a log link function due to  
48 over dispersion in the initial analysis. All analysis was carried out using the Statistical  
49 package for social sciences (SPSS) version 19. Significant p – value was defined as less than  
50 0.05.  
51  
52  
53  
54  
55  
56  
57  
58  
59  
60

## Patient and Public Involvement

Patients and public were not involved in the design study

## Results

**Table: 1 Yearly mortality patterns of AMI from August 1997 to July 2005.**

| Year Period* | Mortality Rate per 10,000 (Number of deaths) |                |                    |               |
|--------------|----------------------------------------------|----------------|--------------------|---------------|
|              | Age:                                         |                |                    |               |
|              | 0 to 64 years                                | 65 to 74 years | 75 years and above | Total         |
| 97/98        | 1.96 (8184)                                  | 24.72 (14299)  | 83.59 (33678)      | 10.87 (56161) |
| 98/99        | 1.81 (7581)                                  | 22.59 (13119)  | 79.84 (32283)      | 10.22 (52983) |
| 99/00        | 1.64 (6924)                                  | 20.11 (11724)  | 74.70 (30330)      | 9.41 (48978)  |
| 00/01        | 1.52 (6435)                                  | 17.99 (10528)  | 67.98 (27716)      | 8.55 (44679)  |
| 01/02        | 1.40 (5964)                                  | 16.28 (9567)   | 65.00 (26610)      | 8.03 (42141)  |
| 02/03        | 1.35 (5784)                                  | 14.71 (8685)   | 64.45 (26495)      | 7.77 (40964)  |
| 03/04        | 1.21 (5189)                                  | 13.39 (7937)   | 60.84 (25125)      | 7.22 (38251)  |
| 04/05        | 1.16 (5005)                                  | 11.84 (7066)   | 55.79 (23180)      | 6.62 (35251)  |
| <b>Total</b> | 1.51 (51066)                                 | 17.70 (82925)  | 69.02 (225417)     | 8.59 (359408) |

Between August 1997 and July 2005 there were 359,408 deaths due to acute myocardial infarction (AMI) with an average death count of 44,926 occurring yearly (Table 1). 62.7% of the total deaths were seen in the age group 75 years and above, 23.1% in age group 65 to 74 years and 14.2% in age group 0 to 64 years. A steady decline in the absolute death counts as well as mortality rates were seen in all age groups across the years (Figure 1). Overall, the decline in mortality rate for acute myocardial infarction was 6.8% yearly between August 1997 and July 2005.

A sharp rise in mortality is noticed in early November and peaks between December and January (Figure 2). A second rise also occurs around the month of March but the mortality rate seen during this period is not as high as that observed during the December and January months. The lowest mortality rates occurred during July and August months.

A plot of the mean temperatures in Celsius (figure 3) showed a trough during the months of December to March and when compared to figure 2 this indicates that lower temperatures are



observed during the peaks of mortality during the year. A plot of the mean monthly temperature with mortality rate showed a significant negative correlation between the two variables ( $r = -0.48$ ;  $P < 0.0001$ ).

### Estimation of Excess Winter Mortality due to AMI

Excess winter mortality was seen in all the years observed. An average of about 2,463 excess winter deaths occurred yearly. In all year periods the highest absolute EWM occurred in those 75 years and above (Table 2). This age group also contribute an average of 70% to the excess winter deaths yearly. The excess winter mortality over the 8 year period resulted in 19,635 total deaths. This is equivalent to 5.5% of the overall yearly mortality due to AMI over the 8 year period.

The excess winter mortality ratio (winter: non-winter rate ratio) is greater than 1 in all year periods considered, indicating that there is greater mortality in winter compared to the non-winter months (Table 3). The excess winter mortality ratio describes the risk in dying during winter compared to non-winter months. This can also be represented as a percentage (Excess winter mortality index). This shows that there is an average 17% excess death yearly (Table 2).

**Table 2: Excess Winter Mortality and index secondary to AMI between 1997-2005**

| Year Period  | EWM (EWMI)            |                |              |              |
|--------------|-----------------------|----------------|--------------|--------------|
|              | Age:<br>0 to 64 years | 65 to 74 years | 75 years +   | Total        |
| <b>97/98</b> | 244.5(9%)             | 731.5(16%)     | 1716.0(16%)  | 2692.0(15%)  |
| <b>98/99</b> | 281.5(12%)            | 756.0(18%)     | 2280.0(23%)  | 3317.5(20%)  |
| <b>99/00</b> | 333.0(15%)            | 643.5(17%)     | 2715.0(29%)  | 3691.5(24%)  |
| <b>00/01</b> | 148.5(7%)             | 368.5(11%)     | 1332.5(15%)  | 1849.5(13%)  |
| <b>01/02</b> | 258.0(14%)            | 453.0(15%)     | 1372.5(16%)  | 2083.5(16%)  |
| <b>02/03</b> | 196.5(11%)            | 423.0(15%)     | 1430.0(17%)  | 2049.5(16%)  |
| <b>03/04</b> | 251.0(15%)            | 260.0(10%)     | 1339.5(17%)  | 1850.5(15%)  |
| <b>04/05</b> | 140.5(9%)             | 466.0(21%)     | 1494.5(21%)  | 2101.0(19%)  |
| <b>Total</b> | 1853.5(11%)           | 4101.5(16%)    | 13680.0(19%) | 19635.0(17%) |

**Table 3. Excess Winter Mortality Ratio secondary to AMI between 1997-2005**

| Year Period        | Excess winter mortality ratio (CI) |                   |                   |                   |
|--------------------|------------------------------------|-------------------|-------------------|-------------------|
|                    | Age:<br>0 to 64 years              | 65 to 74 years    | 75 years +        | Total             |
| 97/98              | 1.09 (1.07, 1.11)                  | 1.16 (1.15, 1.18) | 1.16 (1.15, 1.17) | 1.15 (1.14, 1.16) |
| 98/99              | 1.12 (1.09, 1.14)                  | 1.18 (1.17, 1.20) | 1.23 (1.22, 1.24) | 1.20 (1.19, 1.21) |
| 99/00              | 1.15 (1.13, 1.17)                  | 1.17 (1.16, 1.19) | 1.29 (1.28, 1.31) | 1.24 (1.24, 1.25) |
| 00/01              | 1.07 (1.05, 1.09)                  | 1.11 (1.09, 1.13) | 1.15 (1.14, 1.16) | 1.13 (1.12, 1.14) |
| 01/02              | 1.14 (1.11, 1.16)                  | 1.15 (1.13, 1.17) | 1.16 (1.15, 1.17) | 1.16 (1.15, 1.17) |
| 02/03              | 1.11 (1.08, 1.13)                  | 1.15 (1.13, 1.17) | 1.17 (1.16, 1.18) | 1.16 (1.15, 1.17) |
| 03/04              | 1.15 (1.13, 1.18)                  | 1.10 (1.08, 1.12) | 1.17 (1.16, 1.18) | 1.15 (1.14, 1.16) |
| 04/05              | 1.09 (1.06, 1.11)                  | 1.21 (1.19, 1.23) | 1.21 (1.19, 1.22) | 1.19 (1.18, 1.20) |
| <b>All periods</b> | 1.11 (1.10, 1.13)                  | 1.16 (1.14, 1.17) | 1.19 (1.18, 1.20) | 1.17 (1.17, 1.18) |

A regression analysis was carried using a negative binomial regression to estimate the excess winter mortality ratio and age (Table 4). The relative risk of excess mortality in age groups 65 to 74 years and 75 years and above was 1.36 and 2.45 respectively compared to the younger age group.

**Table 4: Excess winter mortality ratio and age**

| Age            | coefficient | EWM(%) | Relative risk    | P-value |
|----------------|-------------|--------|------------------|---------|
| 0 to 64 years  | reference   | 11     |                  |         |
| 65 to 74 years | 0.31        | 16     | 1.36 (1.18-1.57) | <0.0001 |
| 75 years +     | 0.89        | 19     | 2.45 (2.16-2.77) | <0.0001 |

Figure 4 shows the trend of mortality rate and excess winter mortality index (EWMI) secondary to AMI. There is a steady decline in mortality rate with a significant trend for reduction in AMI associated mortality observed over the period studied ( $p < 0.001$ ). The forecast for the next 11 year periods shows a continued decline. The forecast for the EWMI shows no change and remains relatively the same ( $p < 0.001$ ).

## Discussion

The results from the data analysis showed there is a significant increase in mortality rates due to AMI during the winter period in England and Wales. In this study, the excess winter mortality ratio over the 8 year study period for all age groups was 1.17 with a resultant 17% excess winter deaths for acute myocardial infarction. This amounted to about 20,000 excess deaths due to this disease. From their analysis of 2266 deaths, Biedrzycki and Baithun<sup>1</sup> in their study of mortality from myocardial infarction found that December was the peak month of mortality. A decline was observed from February onwards with the lowest mortality rate observed during the month of August. This pattern is similar to what was elicited in this paper: the highest mortality rates peaked between December and January and lowest mortality rates were observed during the months of July and August. Besides the demonstrable winter excess, the monthly mortality rate plot showed a double peak. A peak in mortality, which was clearly above the mean mortality rate, was observed around the month of March. This second peak in mortality was less than that seen in the months of December and January.

Since fluctuations in daily temperatures could not be appreciated from monthly mean temperature data, it is possible that absolute low outdoor temperatures may not be the only factor in causing mortality but rather daily changes in temperature may also be significant. It has already been established that in most countries in Europe a 1°C drop in temperature is associated in increasing in mortality<sup>12,13</sup>. Carson et al, in their study found that cardiovascular diseases were more sensitive to temperature changes than respiratory disease<sup>31</sup>. This relationship has also been recognized in other studies: Kysely et al<sup>14</sup> found that fluctuations in daily temperatures resulted in increase in mortality rates of cardiovascular diseases. They also noted that a second cold spell usually had a lower excess mortality and suggested that the reason for this might be that some form of acclimatization to the previous cold spell might be protective against the next. This might explain the double peaks that were observed in this study. Large variations in temperatures between winter and non-winter months as seen in countries with warm winters such as England and Wales may also explain the winter paradox observed in Europe. It is possible that the lack of acclimatization due to the non-persistent cold weather, unlike in Iceland and Russia, may lead to a greater impact when the winter

1  
2  
3 season does arrive. However, this is not conclusive and would require more research to  
4 clearly define such an association.  
5  
6

7  
8 The study has shown that AMI has undergone a steady decline in England and Wales over the  
9 years. This is remarkable. The decline of mortality rate from 10.87 deaths per 100,000  
10 population to 6.62 deaths per 10,000 population was observed over the 8 years study period.  
11 This was statistically significant. The reasons for this may include such factors as better  
12 diagnostic and therapeutic procedures, healthier life styles of the population, and better  
13 awareness of the public. Despite this steady decrease in total yearly mortality rate, the risk of  
14 dying from AMI during winter has remained the same. This is suggestive that excess winter  
15 mortality is not a function of the overall mortality. This has important control and prevention  
16 implications: the measures used to control overall mortality may not necessary influence  
17 winter excess.  
18  
19  
20  
21  
22  
23

24  
25 One of such measures could be vitamin D supplementation. There are several factors which  
26 could be possibly associated with excess winter mortality and this may include seasonal  
27 variations in solar ultraviolet-B (UVB) doses and serum 25-hydroxyvitamin D [25(OH)D]  
28 concentrations, temperature and humidity<sup>28</sup>. Amongst these factors, possibly 25(OH)D  
29 concentration (<20 ng/ml) would be modifiable risk factor and its supplementation to levels  
30 greater than 36 ng/mL might reduce death rates significantly in winter months. In a Study in  
31 Iran<sup>32</sup>, supplementation of vitamin to levels greater than 20ng/mL was effective in reducing  
32 the cholesterol level by about 16mg/dl. The clinical significance of this result needs to be  
33 investigated. Several clinical trials as well as observational and ecological studies are on-  
34 going and these will provide results to clarify whether vitamin D deficiency is a modifiable  
35 factor to prevent cardiovascular disease.  
36  
37  
38  
39  
40  
41  
42  
43

44  
45 There was a gradient relationship between excess winter deaths and age: we found increasing  
46 winter deaths with increasing age. A regression model was used to estimate the relationship  
47 between age and winter mortality and we found a more than a two-fold increase in risk when  
48 the oldest age group was compared to the youngest. The older age groups seem to be more  
49 vulnerable to the effects of winter and should be an important risk targeted group for  
50 prevention policies and strategies.  
51  
52  
53  
54  
55  
56  
57  
58  
59  
60

1  
2  
3 The excess winter paradox observed across countries in Europe and the identified decline in  
4 winter deaths seen in some countries suggests that significant increases in death during winter  
5 are preventable. The decline observed in excess winter mortality in all age groups, as well as  
6 overall, observed during the 2000-2001 year is interesting. This period had the lowest  
7 EWMR and also observed the highest percentage drop in EWMR. It also had the least  
8 absolute excess winter death counts among all the year periods studied. A few months  
9 earlier, the UK government introduced innovative measures to tackle the burden of winter  
10 excess deaths. These measures were robust interventions incorporated in the fuel poverty  
11 strategy. This sharp drop in EWMR may suggest that these measures may have had an  
12 immediate impact. However, this study cannot conclusively confirm this. Nevertheless, if  
13 these strategies had had an immediate impact, it was definitely short-lived. This is because  
14 despite the fluctuations the trend has remained the same. In other words, the increased risk of  
15 dying during winter due to AMI has remained high in England and Wales despite the various  
16 strategies implemented by the government, and the trend analysis shows that it will remain so  
17 for a couple of years. It might be that it is too soon to evaluate the impact of these measures  
18 or they may not be effective.  
19  
20  
21  
22  
23  
24  
25  
26  
27  
28  
29

30 The results of this study can be generalised to any population where significant winter occurs,  
31 and an assumption can be made that a significant winter is when the temperature drops below  
32 18°C over a defined period. As elucidated in the preceding paragraphs, this has been observed  
33 in various countries in Europe, America and Asia. However, the impact in winter mortality  
34 may vary from society to society because of other ecological factors such as behavioural,  
35 housing, as well as immunisation practices.  
36  
37  
38  
39  
40

41 This study was a secondary data analysis and it faced certain limitations. Although the data  
42 provided by the ONS was complete and considered accurate, the data characteristics however  
43 restricted the number of variables that could be controlled such as sex distribution. To reach a  
44 more robust conclusion it would have been necessary to have data to test for effects of  
45 housing, indoor temperatures, outdoor temperatures, influenza epidemics as well as other  
46 possible confounders. It has been identified in existing literature that these factors play a part  
47 in the complex mechanism that brings about excess winter mortality. It would have been  
48 appropriate to adjust for their effects. Also, the population data which was used as  
49 denominator would reduce in accuracy as the year of study moved away from the recent  
50 census (29<sup>th</sup> April 2001). This is because the midyear populations after this date were  
51  
52  
53  
54  
55  
56  
57  
58  
59  
60

1  
2  
3 extrapolated using birth and death data; these data are prone to their own type of error.  
4 However, it is anticipated that the brief period used in the research was unlikely to experience  
5 any dramatic changes in population. The method used in this study to estimate excess winter  
6 mortality was first described by Curwen<sup>4</sup>, and this method defines the winter period between  
7 December and January. It has an advantage because these months have constantly shown  
8 mortality rates greater than the mean monthly mortality rates. It is essential to note this  
9 method of assessment when comparing future studies on excess winter mortality as other  
10 studies may use calendar winter months in their analysis.  
11  
12  
13  
14  
15

## 16 17 **Conclusion**

18 This study has shown that increased winter mortality due to acute myocardial infarction does  
19 exist. The excess winter mortality has remained high for AMI for England and Wales over  
20 the years. The study also identified an association between increasing age and increasing  
21 excess winter mortality. There is a possibility that acclimatization may play a role in the  
22 mechanisms that initiate winter deaths.  
23  
24  
25  
26  
27

## 28 **Figure Legends**

29 **Figure 1:** Showing a decline in mortality rate due to AMI over the year periods  
30  
31

32 **Figure 2** Showing variation in mortality rate over the months over the year periods  
33  
34

35 **Figure 3:** A plot of the mean monthly temperatures in Celsius with an obvious deep in  
36 temperatures during the months of December to March  
37  
38  
39

40 **Figure 4:** Trend in mortality rate and excess winter mortality index over the year period  
41 observed and forecast for the next 11 years. There is a steady decline in mortality rate with a  
42 significant trend for reduction in AMI associated mortality. The forecast for the next 11 year  
43 periods shows a continued decline. The forecast for the EWMI shows no change.  
44  
45  
46  
47  
48

## 49 **A. Contributor ship Statement**

50 **Find below the contribution of each author**  
51  
52  
53  
54  
55  
56  
57  
58  
59  
60

- **Osakpolor Ogbemor:** literature review, data analysis and interpretation of data. Drafting the manuscript, revising manuscript. Approval of the version of the manuscript to be published
- **Odugbemi Babatunde:** literature review, drafting the manuscript, revising manuscript. Approval of the version of the manuscript to be published
- **Maheswaran Ravi.:** Conception and design of study, acquisition of data, literature review, revising manuscript. Approval of the version of the manuscript to be published.
- **Patel Kavya:** drafting the manuscript, revising manuscript. Approval of the version of the manuscript to be published.

**B. Competing interest:** None

**C. Funding:** Self-funded by the authors

**D. Data sharing statement:** The data used in this study was obtained from the office of national statistics, United Kingdom.

## References

1. Biedrzycki, Baithun S. Seasonal variation in mortality from myocardial infarction and haemopericardium. A post-mortem study. *J Clin Pathol.* 2006; 59: 64-66.
2. Sheth T, Nair C, Muller J, Yusuf S. Increased winter mortality from acute myocardial infarction and stroke: the effect of age. *JACC.* 1999; 33(7):1916–9.
3. Spencer F, Goldberg RJ, Becker RC, Gore MJ. Seasonal distribution of acute myocardial infarction in the second national registry of myocardial infarction. *JACC.* 1998; 31(6):1226–33.
4. Curwen M. Excess winter mortality: a British phenomenon? *Health Trends* 1990/91; 22:169-75. In: Aylin P, Morris S, Wakefield J, Grossinho A, Jarup L, Elliot P. Temperature, housing, deprivation and their relationship to excess winter mortality in Great Britain, 1986-1996. *Int J Epid.* 2001; 30: 1100-1108.
5. Healy JD. Excess winter mortality in Europe: a cross country analysis identifying key risk factors. *J Epidemiol Community Health* 2003; 57:784–9.



- 1
- 2
- 3 6. Rumana N, Kita Y, Turin TC et al. Seasonal pattern of incidence and case fatality of
- 4 acute myocardial infarction in a Japanese population (from the Takashima AMI
- 5 Registry, 1988 to 2003). *Am J Cardiol.* 2008; 102(10):1307-1311.
- 6
- 7 7. Sharovsky R, César L. Increase in mortality due to myocardial infarction in the
- 8 Brazilian City of São Paulo during winter. *Arq Bras Cardiol.* 2002; 78(1): 106-109.
- 9
- 10 8. Davie GS, G Baker MG, Hales S, Carlin JB. Trends and determinants of excess
- 11 winter mortality in New Zealand: 1980 to 2000. *BMC Public Health.* 2007; 7:263-
- 12 272.
- 13
- 14 9. Curriero FC, Heiner KS, Samet JM, Zeger SL, Strug L, Patz JA. Temperature and
- 15 mortality in 11 cities of the eastern United States. *Am J Epidemiol* 2002; 155:80-87.
- 16
- 17 10. Aylin P, Morris S, Wakefield J, Grossinho A, Jarup L, Elliot P. Temperature, housing,
- 18 deprivation and their relationship to excess winter mortality in Great Britain, 1986-
- 19 1996. *Int J Epid.* 2001; 30: 1100-1108.
- 20
- 21 11. Eurowinter Group. Cold exposure and winter mortality from ischaemic heart disease,
- 22 cerebrovascular disease, respiratory disease, and all causes, in warm and cold regions
- 23 of Europe. *Lancet.* 1997; 349:1341–1346.
- 24
- 25 12. Gemmell I, McLoone P, Boddy FA, et al. Seasonal variation in mortality in Scotland.
- 26 *Int J Epidemiol* 2000; 29:274–9
- 27
- 28 13. Bhaskaran K, Hajat S, Haines A, Herrett E, Wilkinson P, Smeeth L. Short term effects
- 29 of temperature on risk of myocardial infarction in England and Wales: time series
- 30 regression analysis of the Myocardial Ischaemia National Audit Project (MINAP)
- 31 registry. *BMJ.* 2010; 341:c3720.
- 32
- 33 14. Kysely J, Pokorna L, Kyncl J, Kriz B. Excess cardiovascular mortality associated with
- 34 cold spells in the Czech Republic. *BMC Public Health.* 2009; 9:19.
- 35
- 36 15. Kunst AE, Looman CW, Mackenbach JP. Outdoor air temperature and mortality in
- 37 The Netherlands: a time-series analysis. *Am J Epidemiol.* 1993; 137(3):331-41.
- 38
- 39 16. Laake K, Sverre JM. Winter Excess Mortality: A Comparison between Norway and
- 40 England plus Wales. *Age and Ageing.* 1996; 25:343-348.
- 41
- 42 17. McKee CM. Deaths in winter: can Britain learn from Europe? *Eur J Epidemiol.* 1989
- 43 Jun; 5(2):178-82.
- 44
- 45 18. Clinch JP, Healy JD. Housing standards and excess winter mortality. *J Epidemiol*
- 46 *Community Health* 2000; 54:719–20.
- 47
- 48
- 49
- 50
- 51
- 52
- 53
- 54
- 55
- 56
- 57
- 58
- 59
- 60



19. Fuel Poverty Team. UK fuel poverty strategy: November 2001 - Ministerial Foreword. [Accessed 5 Aug 2010]. Available from: [www.berr.gov.uk/files/file16495.pdf](http://www.berr.gov.uk/files/file16495.pdf).
20. Donaldson GC, Tchernjavskii VE, Ermakov SP, Bucher K, Keatinge WR. Winter mortality and cold stress in Yekaterinburg, Russia: interview survey. *BMJ*. 1998; 316(7130):514-8.
21. Madjid M, Naghavi M, Litovsky S, Casscells SW. Influenza and cardiovascular disease: a new opportunity for prevention and the need for further studies. *Circulation*. 2003; 108(22):2730-2736.
22. Donaldson GC, Keatinge WR. Excess winter mortality: influenza or cold stress? Observational study. *BMJ*. 2002; 324(7329):89-90.
23. Tokarz A, Beata Kuśnierz-Cabała B, Kuźniewski M. Seasonal effect of vitamin D deficiency in patients with acute myocardial infarction. *Kardiol Pol* 2016; 74, 8: 786–792.
24. Welles CC, Whooley MA, Karumanchi SA, et al. Vitamin D deficiency and cardiovascular events in patients with coronary heart disease: data from the Heart and Soul Study, *Am J Epidemiology*, 2014, vol. 179 11(pg. 1279-1287)
25. Aleksova A, Belfiore R, Carriere C, Kassem S, La Carrubba S, Barbati G, Sinagra G. Vitamin D Deficiency in Patients with Acute Myocardial Infarction: An Italian Single-Center Study. *Int J Vitam Nutr Res*. 2015;85 (1-2):23-30.
26. Verdoia M, Schaffer A, Sartori C et al. Vitamin D deficiency is independently associated with the extent of coronary artery disease. *Eur J Clin Invest*, 2014; 44: 634–642
27. Sahin I, Okuyan E, Gungor B et al. Lower vitamin D level is associated with poor coronary collateral circulation. *Scand Cardiovasc J*, 2014; 48: 278–283. doi: 10.3109/14017431.2014.940062.
28. Grant WB, Bhottoa HP, Boucher BJ. Seasonal variations of U.S. mortality rates: Roles of solar ultraviolet-B doses, vitamin D, gene expression, and infections. *J Steroid Biochem Mol Biol*. 2017 Oct;173:5-12.
29. Anderson RN, M. Miniño AM, Hoyert DL, Rosenberg HM. Comparability of cause of death between ICD–9 and ICD–10: preliminary estimates. *Natl Vital Stat*. 2001; 49 (2): 1-32.
30. Johnson H, Griffiths C. Estimating excess winter mortality in England and Wales. *Health Statistics Quarterly*. 2003; 20: 19–24.

- 1  
2  
3 31. Carson C, Hajat S, Armstrong B, Wilkinson P. Declining Vulnerability to  
4 Temperature-related Mortality in London over the 20th Century. *Am J Epidemiol*  
5 2006; 164:77–84.  
6  
7  
8 32. Rahimi-Ardabili H, Pourghassem Gargari B, Farzadi L. Effects of vitamin D on  
9 cardiovascular disease risk factors in polycystic ovary syndrome women with vitamin  
10 D deficiency, *J Endocrinol Invest* , 2013, vol. 36 1(pg. 28-32)  
11  
12  
13  
14  
15  
16  
17  
18  
19  
20  
21  
22  
23  
24  
25  
26  
27  
28  
29  
30  
31  
32  
33  
34  
35  
36  
37  
38  
39  
40  
41  
42  
43  
44  
45  
46  
47  
48  
49  
50  
51  
52  
53  
54  
55  
56  
57  
58  
59  
60

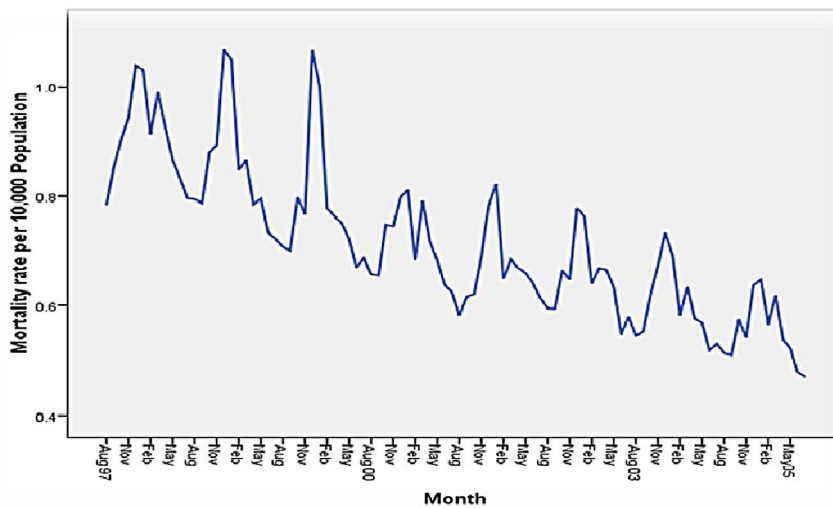

Figure 1: Showing a decline in mortality rate due to AMI over the year periods

203x114mm (300 x 300 DPI)

review only

1  
2  
3  
4  
5  
6  
7  
8  
9  
10  
11  
12  
13  
14  
15  
16  
17  
18  
19  
20  
21  
22  
23  
24  
25  
26  
27  
28  
29  
30  
31  
32  
33  
34  
35  
36  
37  
38  
39  
40  
41  
42  
43  
44  
45  
46  
47  
48  
49  
50  
51  
52  
53  
54  
55  
56  
57  
58  
59  
60

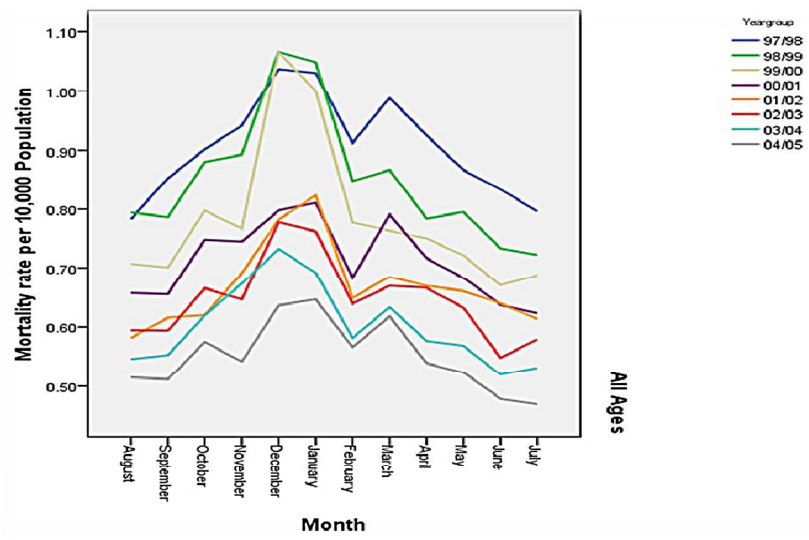

Figure 2: showing variation in mortality rate over the months over the year periods

203x114mm (300 x 300 DPI)

review only

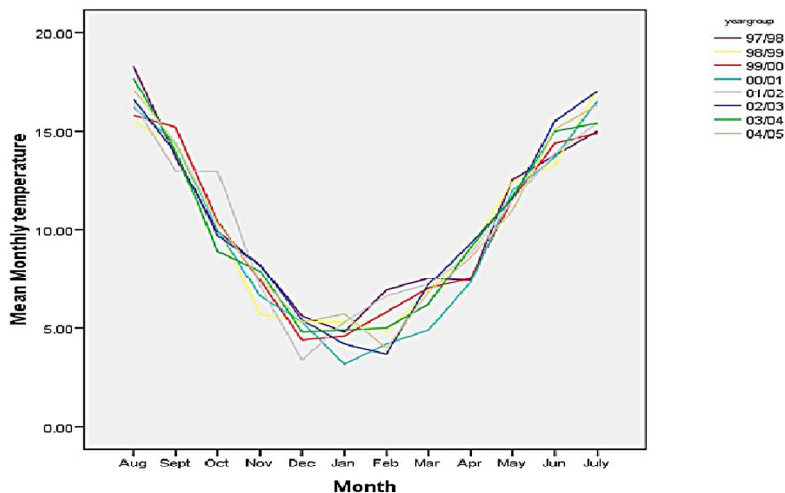

Figure 3: A plot of the mean monthly temperatures in Celsius with an obvious dip in temperatures during the months of December to March

203x114mm (300 x 300 DPI)

Review only

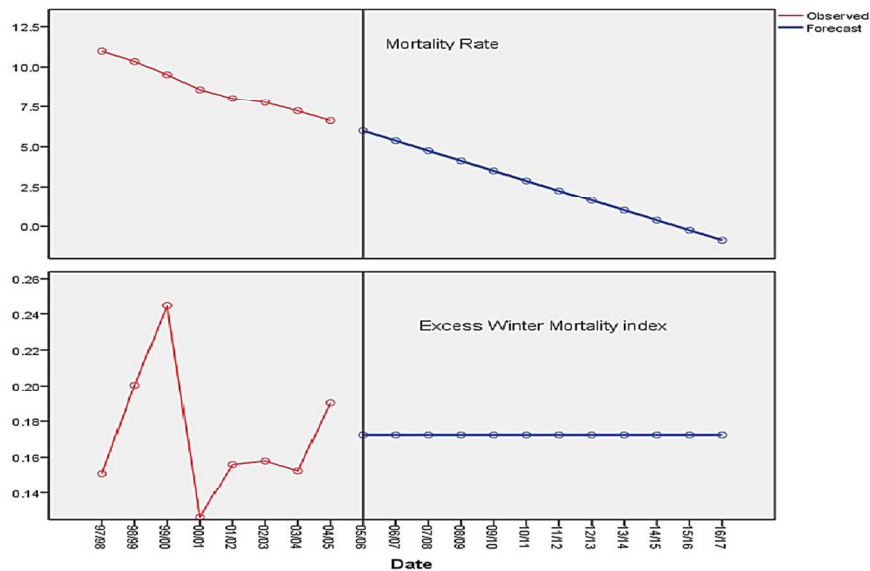

Figure 4: Trend in mortality rate and excess winter mortality index over the year period observed and forecast for the next 11 years. There is a steady decline in mortality rate with a significant trend for reduction in AMI associated mortality. The forecast for the next 11 year periods shows a continued decline. The forecast for the EWMI shows no change.

117x68mm (300 x 300 DPI)

## STROBE Statement—checklist of items that should be included in reports of observational studies

|                              | Item No. | Recommendation                                                                                                                                                                                                                                                                                                      | Page No.        | Relevant text from manuscript                                   |
|------------------------------|----------|---------------------------------------------------------------------------------------------------------------------------------------------------------------------------------------------------------------------------------------------------------------------------------------------------------------------|-----------------|-----------------------------------------------------------------|
| <b>Title and abstract</b>    | 1        | (a) Indicate the study's design with a commonly used term in the title or the abstract                                                                                                                                                                                                                              | 1               |                                                                 |
|                              |          | (b) Provide in the abstract an informative and balanced summary of what was done and what was found                                                                                                                                                                                                                 | 1               |                                                                 |
| <b>Introduction</b>          |          |                                                                                                                                                                                                                                                                                                                     |                 |                                                                 |
| Background/rationale         | 2        | Explain the scientific background and rationale for the investigation being reported                                                                                                                                                                                                                                | 3-5             |                                                                 |
| Objectives                   | 3        | State specific objectives, including any prespecified hypotheses                                                                                                                                                                                                                                                    | 5               |                                                                 |
| <b>Methods</b>               |          |                                                                                                                                                                                                                                                                                                                     |                 |                                                                 |
| Study design                 | 4        | Present key elements of study design early in the paper                                                                                                                                                                                                                                                             | 5               |                                                                 |
| Setting                      | 5        | Describe the setting, locations, and relevant dates, including periods of recruitment, exposure, follow-up, and data collection                                                                                                                                                                                     | 5-6             |                                                                 |
| Participants                 | 6        | (a) <i>Cohort study</i> —Give the eligibility criteria, and the sources and methods of selection of participants. Describe methods of follow-up                                                                                                                                                                     | Not Applicable  |                                                                 |
|                              |          | <i>Case-control study</i> —Give the eligibility criteria, and the sources and methods of case ascertainment and control selection. Give the rationale for the choice of cases and controls<br><i>Cross-sectional study</i> —Give the eligibility criteria, and the sources and methods of selection of participants |                 |                                                                 |
|                              |          | (b) <i>Cohort study</i> —For matched studies, give matching criteria and number of exposed and unexposed                                                                                                                                                                                                            | Not Applicable  |                                                                 |
|                              |          | <i>Case-control study</i> —For matched studies, give matching criteria and the number of controls per case                                                                                                                                                                                                          |                 |                                                                 |
| Variables                    | 7        | Clearly define all outcomes, exposures, predictors, potential confounders, and effect modifiers. Give diagnostic criteria, if applicable                                                                                                                                                                            | 5-6             |                                                                 |
| Data sources/<br>measurement | 8*       | For each variable of interest, give sources of data and details of methods of assessment (measurement). Describe comparability of assessment methods if there is more than one group                                                                                                                                | 5-6             | <i>For example the use of comparability ratio for ICD codes</i> |
| Bias                         | 9        | Describe any efforts to address potential sources of bias                                                                                                                                                                                                                                                           | 5-6             |                                                                 |
| Study size                   | 10       | Explain how the study size was arrived at                                                                                                                                                                                                                                                                           | Not applicable. |                                                                 |

1  
2  
3  
4  
5  
6  
7  
8  
9  
10  
11  
12  
13  
14  
15  
16  
17  
18  
19  
20  
21  
22  
23  
24  
25  
26  
27  
28  
29  
30  
31  
32  
33  
34  
35  
36  
37  
38  
39  
40  
41  
42  
43  
44  
45  
46  
47

---

All mortality  
due to AMI in  
England and  
Wales over the  
period studied  
was sampled

---

Continued on next page

For peer review only



|                        |     |                                                                                                                                                                                                                                                                                                           |                |                                                                     |
|------------------------|-----|-----------------------------------------------------------------------------------------------------------------------------------------------------------------------------------------------------------------------------------------------------------------------------------------------------------|----------------|---------------------------------------------------------------------|
| Quantitative variables | 11  | Explain how quantitative variables were handled in the analyses. If applicable, describe which groupings were chosen and why                                                                                                                                                                              | 5-6            |                                                                     |
| Statistical methods    | 12  | (a) Describe all statistical methods, including those used to control for confounding                                                                                                                                                                                                                     | 5-6            |                                                                     |
|                        |     | (b) Describe any methods used to examine subgroups and interactions                                                                                                                                                                                                                                       | 5-6            | For example regression model used in the data analysis              |
|                        |     | (c) Explain how missing data were addressed                                                                                                                                                                                                                                                               | Not Applicable |                                                                     |
|                        |     | (d) <i>Cohort study</i> —If applicable, explain how loss to follow-up was addressed<br><i>Case-control study</i> —If applicable, explain how matching of cases and controls was addressed<br><i>Cross-sectional study</i> —If applicable, describe analytical methods taking account of sampling strategy | Not Applicable |                                                                     |
|                        |     | (e) Describe any sensitivity analyses                                                                                                                                                                                                                                                                     | Not Applicable |                                                                     |
| <b>Results</b>         |     |                                                                                                                                                                                                                                                                                                           |                |                                                                     |
| Participants           | 13* | (a) Report numbers of individuals at each stage of study—eg numbers potentially eligible, examined for eligibility, confirmed eligible, included in the study, completing follow-up, and analysed                                                                                                         | Not Applicable |                                                                     |
|                        |     | (b) Give reasons for non-participation at each stage                                                                                                                                                                                                                                                      | Not Applicable |                                                                     |
|                        |     | (c) Consider use of a flow diagram                                                                                                                                                                                                                                                                        | Not Applicable |                                                                     |
| Descriptive data       | 14* | (a) Give characteristics of study participants (eg demographic, clinical, social) and information on exposures and potential confounders                                                                                                                                                                  | 7-9            |                                                                     |
|                        |     | (b) Indicate number of participants with missing data for each variable of interest                                                                                                                                                                                                                       | Not Applicable |                                                                     |
|                        |     | (c) <i>Cohort study</i> —Summarise follow-up time (eg, average and total amount)                                                                                                                                                                                                                          | N/A            |                                                                     |
| Outcome data           | 15* | <i>Cohort study</i> —Report numbers of outcome events or summary measures over time                                                                                                                                                                                                                       | 7-9            |                                                                     |
|                        |     | <i>Case-control study</i> —Report numbers in each exposure category, or summary measures of exposure                                                                                                                                                                                                      | N/A            |                                                                     |
|                        |     | <i>Cross-sectional study</i> —Report numbers of outcome events or summary measures                                                                                                                                                                                                                        | N/A            |                                                                     |
| Main results           | 16  | (a) Give unadjusted estimates and, if applicable, confounder-adjusted estimates and their precision (eg, 95% confidence interval). Make clear which confounders were adjusted for and why they were included                                                                                              | 7-9            | Provided CI for estimation Excess winter mortality ratio ( Table 3) |

1  
2  
3  
4  
5  
6  
7  
8  
9  
10  
11  
12  
13  
14  
15  
16  
17  
18  
19  
20  
21  
22  
23  
24  
25  
26  
27  
28  
29  
30  
31  
32  
33  
34  
35  
36  
37  
38  
39  
40  
41  
42  
43  
44  
45  
46  
47

---

|                                                                                                                         |     |
|-------------------------------------------------------------------------------------------------------------------------|-----|
| <i>(b)</i> Report category boundaries when continuous variables were categorized                                        | N/A |
| <i>(c)</i> If relevant, consider translating estimates of relative risk into absolute risk for a meaningful time period | N/A |

---

Continued on next page

For peer review only

|                          |    |                                                                                                                                                                            |       |                                                                                |
|--------------------------|----|----------------------------------------------------------------------------------------------------------------------------------------------------------------------------|-------|--------------------------------------------------------------------------------|
| Other analyses           | 17 | Report other analyses done—eg analyses of subgroups and interactions, and sensitivity analyses                                                                             | 7-9   | Regression models was described                                                |
| <b>Discussion</b>        |    |                                                                                                                                                                            |       |                                                                                |
| Key results              | 18 | Summarise key results with reference to study objectives                                                                                                                   | 10-12 |                                                                                |
| Limitations              | 19 | Discuss limitations of the study, taking into account sources of potential bias or imprecision. Discuss both direction and magnitude of any potential bias                 | 12    |                                                                                |
| Interpretation           | 20 | Give a cautious overall interpretation of results considering objectives, limitations, multiplicity of analyses, results from similar studies, and other relevant evidence | 10-12 |                                                                                |
| Generalisability         | 21 | Discuss the generalisability (external validity) of the study results                                                                                                      | 10-12 | Previous studies were compared to the results of this study in the discussion. |
| <b>Other information</b> |    |                                                                                                                                                                            |       |                                                                                |
| Funding                  | 22 | Give the source of funding and the role of the funders for the present study and, if applicable, for the original study on which the present article is based              | 13    | No external funding                                                            |

\*Give information separately for cases and controls in case-control studies and, if applicable, for exposed and unexposed groups in cohort and cross-sectional studies.

**Note:** An Explanation and Elaboration article discusses each checklist item and gives methodological background and published examples of transparent reporting. The STROBE checklist is best used in conjunction with this article (freely available on the Web sites of PLoS Medicine at <http://www.plosmedicine.org/>, Annals of Internal Medicine at <http://www.annals.org/>, and Epidemiology at <http://www.epidem.com/>). Information on the STROBE Initiative is available at [www.strobe-statement.org](http://www.strobe-statement.org).
